# Supplementary material for: Programmable RNA-guided DNA endonucleases are widespread in eukaryotes and their viruses
Source: PubMed Central journal article supplement — Sci Adv. 2023 Sep 27;9(39):eadk0171. doi: 10.1126/sciadv.adk0171 (PMC10530073; doi:10.1126/sciadv.adk0171), 2023-09-27
Supplement: sciadv.adk0171_sm.pdf [file sciadv.adk0171_sm.pdf]

Supplementary Materials for  
**Programmable RNA-guided DNA endonucleases are widespread in  
eukaryotes and their viruses**

Kaiyi Jiang *et al.*

Corresponding author: Omar O. Abudayyeh, [omar@abudayyeh.science](mailto:omar@abudayyeh.science); Jonathan S. Gootenberg, [jgoot@mit.edu](mailto:jgoot@mit.edu)

*Sci. Adv.* **9**, eadk0171 (2023)  
DOI: 10.1126/sciadv.adk0171

**The PDF file includes:**

Figs. S1 to S13  
Tables S1 to S5  
Legend for data S1

**Other Supplementary Material for this manuscript includes the following:**

Data S1

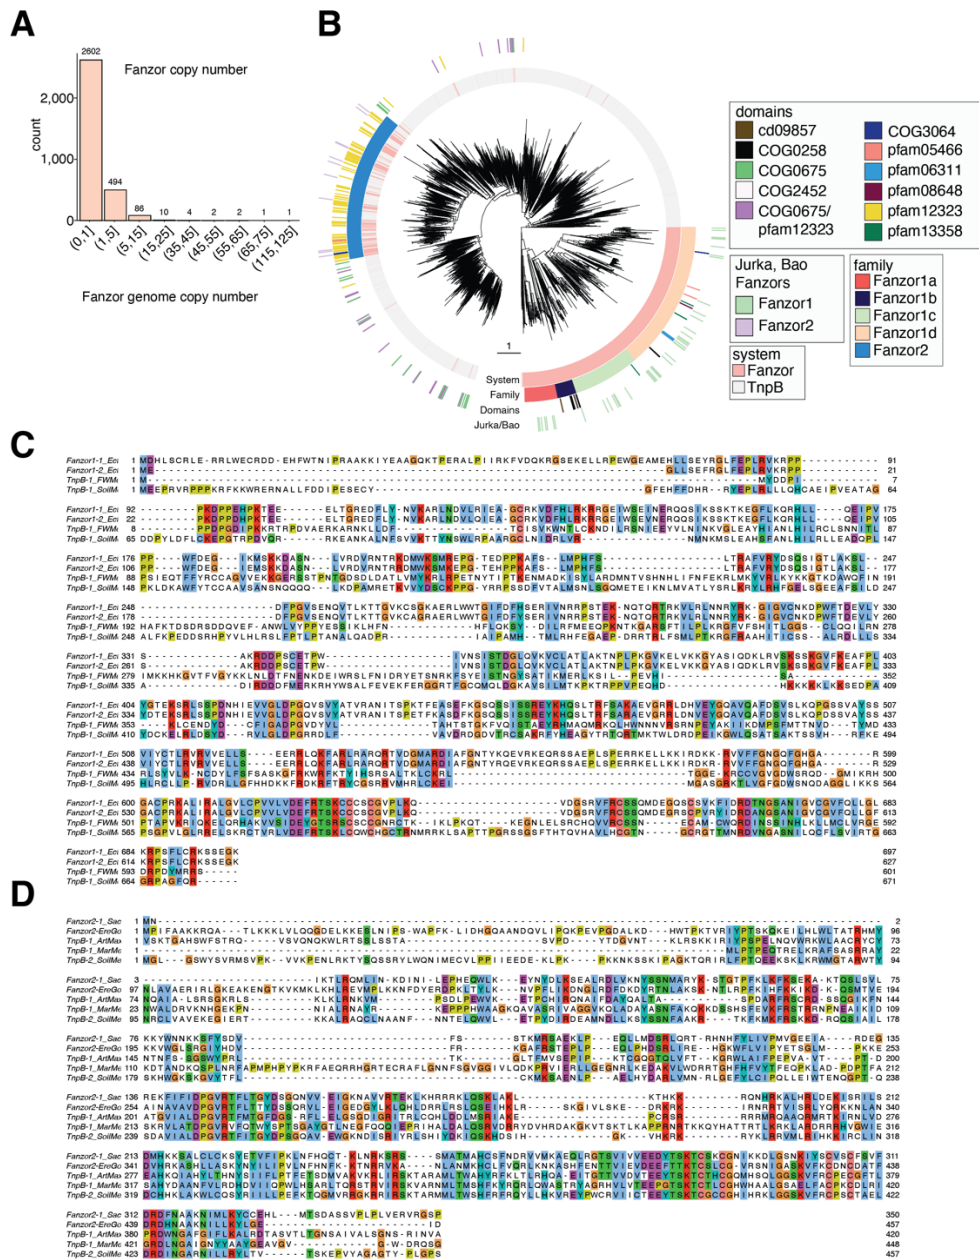

**Fig. S1: Genomic characteristics of Fanzor family members**

A) A histogram of the copy number of individual Fanzor members inside their respective genomes. B) Phylogenetic tree of Fanzors and TnpBs with the domain predictions of nearby proteins marked as a ring (the nearest 5 genes downstream and upstream). Previously discovered Fanzors are marked in the outer ring(5). C) Alignment of Fanzor1 proteins with closely related TnpBs. D) Alignment of Fanzor 2 proteins with closely related TnpBs.

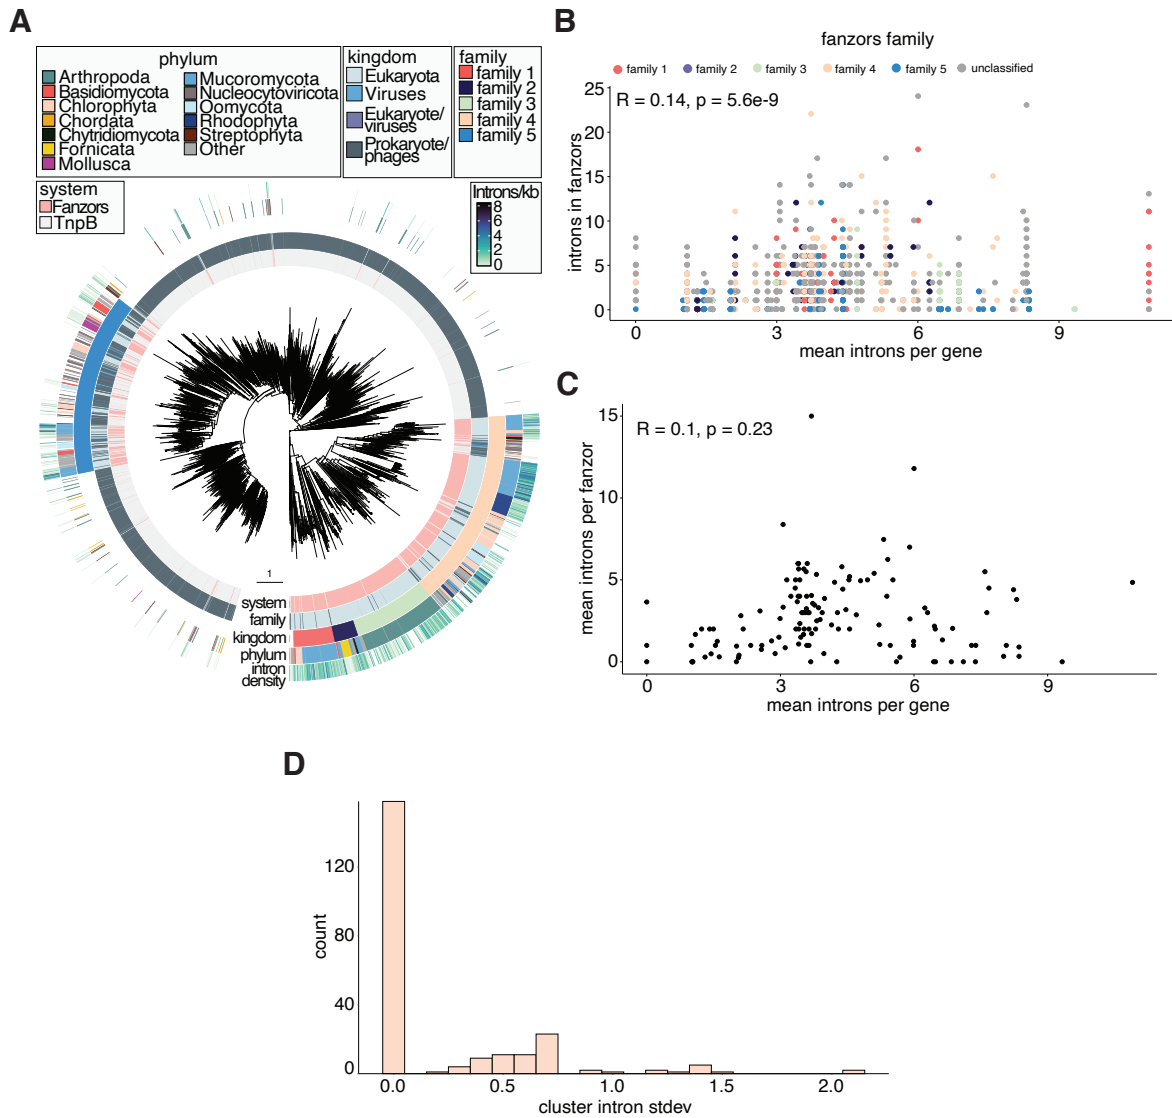

**Fig. S2: Fanzor intron characterization.**

A) Phylogenetic tree of Fanzors and TnpBs with rings to show the host superkingdom, phylum, and intron density of the Fanzor proteins. B) Scatterplot showing the intron density of the Fanzor proteins along with the mean intron density of their host genomes. Fanzor proteins are colored according to their family designations. C) Scatterplot showing the mean intron densities of the Fanzor proteins in a genome along with the mean intron density of their host genomes. D) Histogram of the standard deviation of intron densities within 70% similarity clusters of Fanzor proteins.

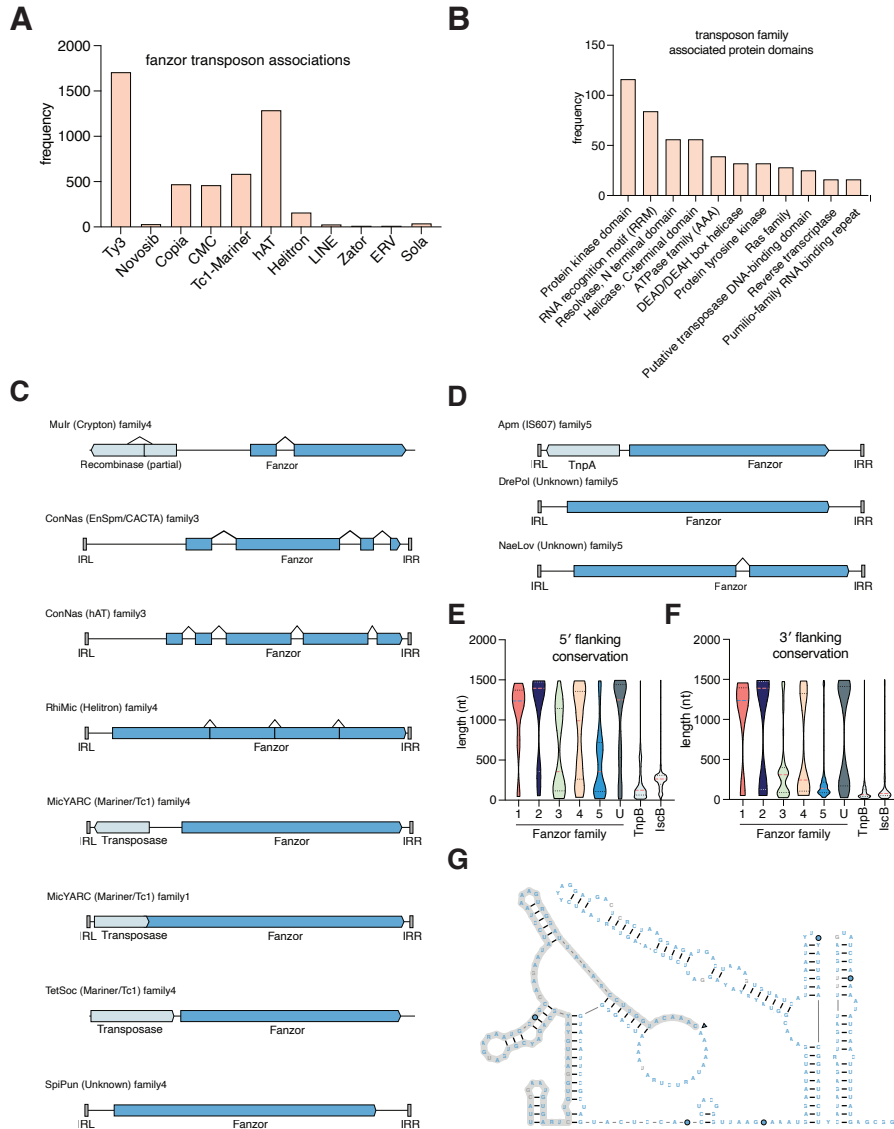

**Fig. S3: Locus characteristics of Fanzor family members**

A) Frequency of predicted associated transposons nearby Fanzor (within  $\pm 10$  kb) per transposon family type. B) Frequency of the top occurring nearby protein domains within 5 genes upstream or downstream of the Fanzor MGE. C) Locus schematics of different Fanzor1 nucleases and their associated transposons. IRL marks the left inverted repeat and IRR marks the right inverted repeat. D) Locus schematics of different Fanzor2 nucleases and their associated transposons. E) Comparison of predicted flanking non-coding conservation lengths at the 5' end of the MGEs of IscB, TnpB, and each Fanzor family. F) Comparison of predicted flanking non-coding conservation lengths at the 3' end of the MGEs of IscB, TnpB, and each Fanzor family. G) Conserved secondary structure of fRNAs between the different copies of the ApmFNuc family. Shaded gray area corresponds to conserved sequence not present in the mature fRNA, potentially removed by RNase processing (cut site designated by blue triangle).

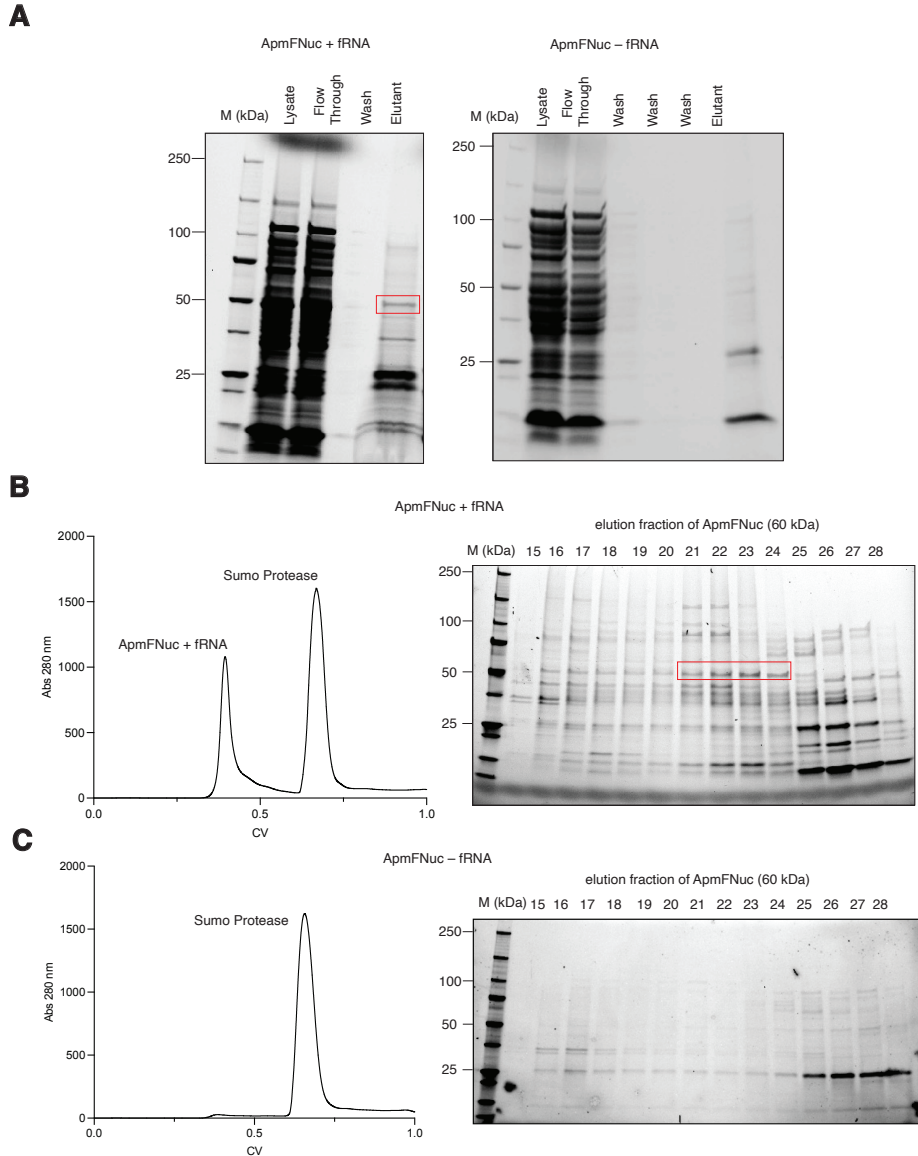

**Fig. S4: Purification of ApmFNuc RNPs.**

A) Protein gel showing flowthrough and eluent of ApmFNuc products during gravity flow strep-bead purifications prior to loading of FPLC. Red square denotes the desired protein product. B) FPLC traces of ApmFNuc purified with its fRNA and protein gels showing each fraction's protein products with the desired protein product that was pooled labeled with red squares. C) FPLC traces of ApmFNuc purified without its fRNA and protein gels showing no RNP product in all observed fractions.

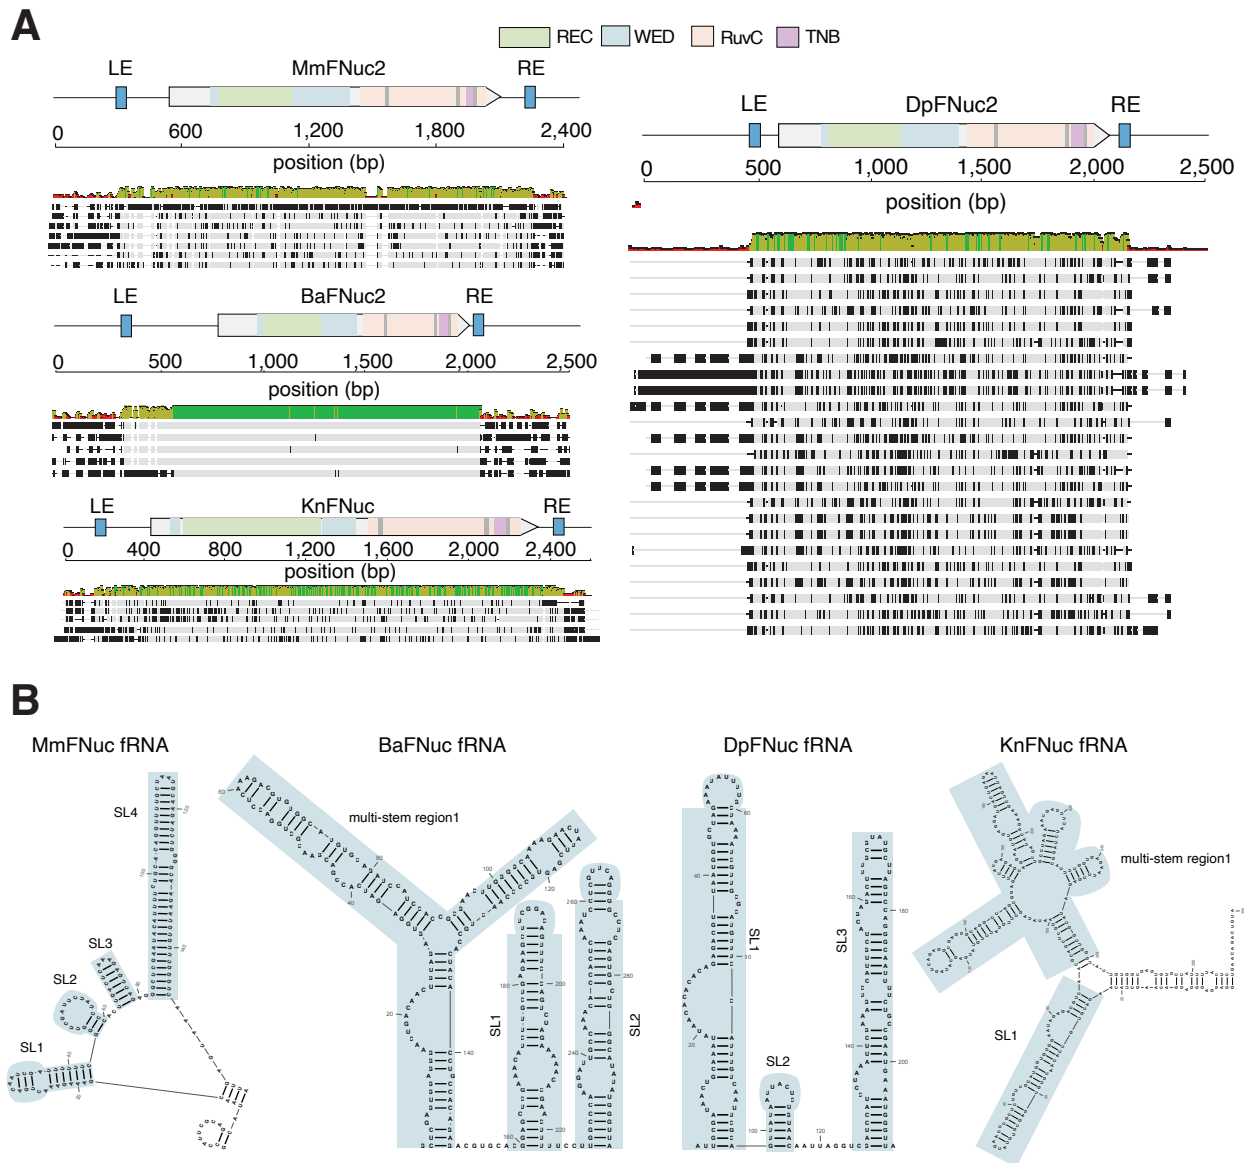

**Fig. S5: Characterization of eukaryotic Fanzor nucleases.**

A) Alignment and domain annotation of three eukaryotic Fanzor nucleases (DpFNuc, MmFNuc, and BaFNuc). RE and LE elements are determined by conservation dropoff between alignments of different copies in the genome. B) Secondary structure prediction of fRNAs associated with DpFNuc, MmFNuc, and BaFNuc determined by small RNA sequencing of the locus. Blue shaded region denotes stem loops and multi-stem loops region in the fRNAs.

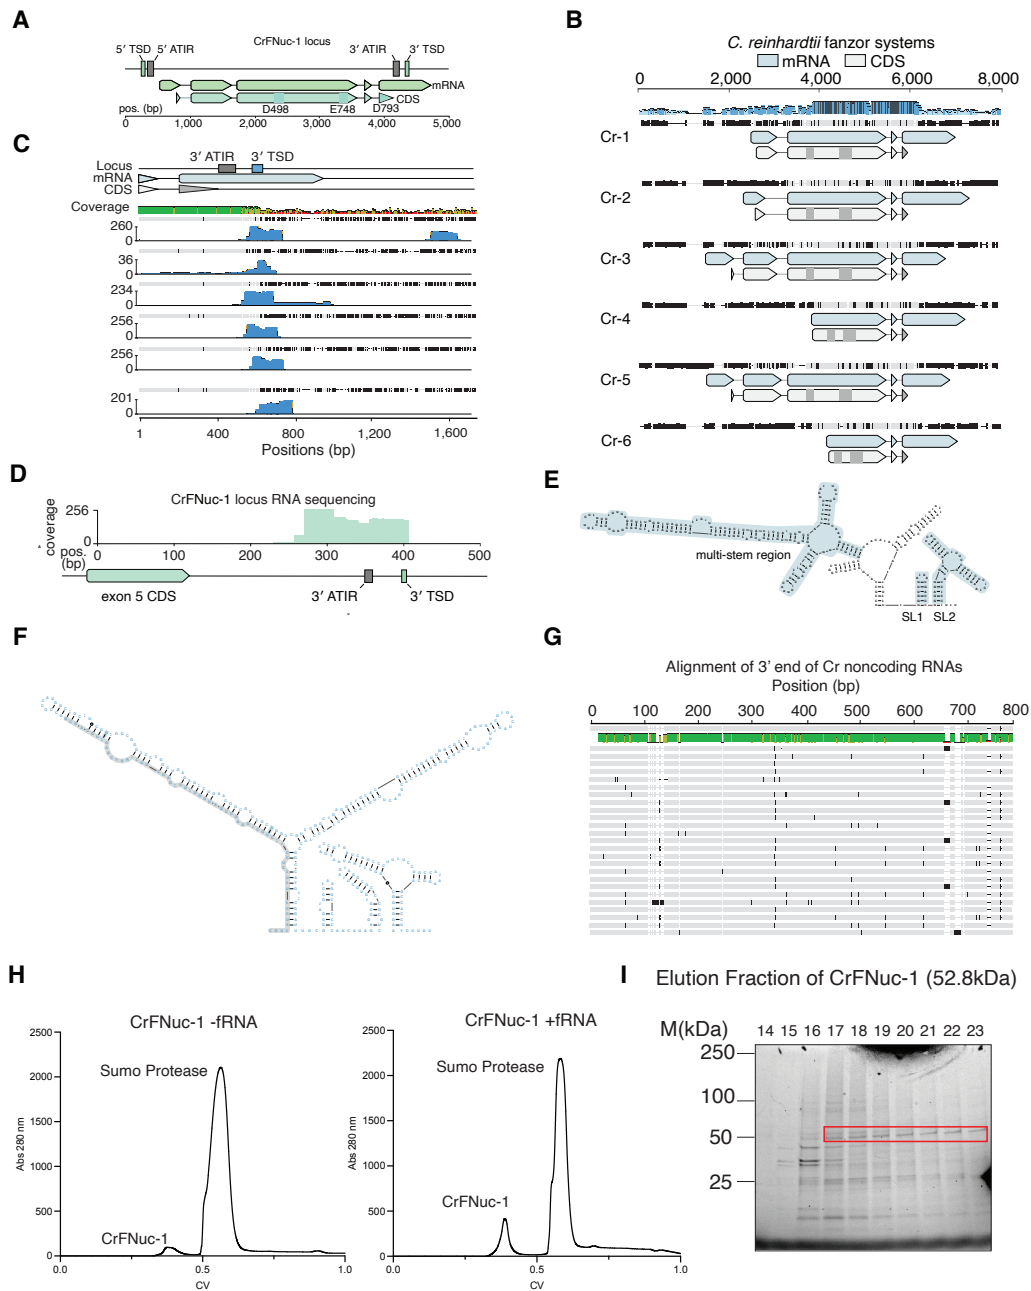

**Fig. S6: Characterization of Cr-1fNuc and its fRNA.**

A) Schematic of the *Chlamydomonas reinhardtii* Fanzor1 system (Cr-1fNuc), including the 5' asymmetrical terminal inverted repeats (ATIR), 3' ATIR, 5' target site duplications (TSD), 3' TSD, and the mRNA and coding sequences for Cr-1fNuc. The mRNA track shows the processed mRNA transcripts relative to the genome and the CDS track shows the ORF coding sequences relative to the genome. B) Alignment of all six copies of Fanzor systems inside the annotated parts of *C. reinhardtii* genome, showing highly conserved 3' ends of the CrFNuc proteins along with their fRNAs and variable 5' end compositions of the proteins. The blue track shows the processed mRNA transcripts relative to the genome and the gray track shows the ORF coding

sequences relative to the genome. C) Small RNA sequencing traces mapped onto all 6 copies of RuvC-containing Fanzor systems in the *C. reinhardtii* genome. D) Small RNA sequencing of the *Chlamydomonas reinhardtii* organism showing expression of a noncoding RNA species at the 3' end of the Cr-1FNuc locus that extends beyond the ATIR into the TSD. E) Secondary structure of Cr-1FNuc non-coding RNA from Fig. 3J, showing significant folding of the fRNA. F) Conserved secondary structure of the six CrFNuc fRNA copies in the genome. G) Alignment of the 26 full or partial copies of Fanzor MGEs inside the *C. reinhardtii* genome at their 3' ends. H) FPLC traces of Cr-1FNuc purified either with or without its fRNA, showing that the RNP complex is only stable when the correct fRNA is expressed and present. The Cr-1FNuc peak in the FPLC trace is labeled. I) Protein gel showing elution fractions of the Cr-1FNuc with the desired protein product that was pooled labeled with a red square.



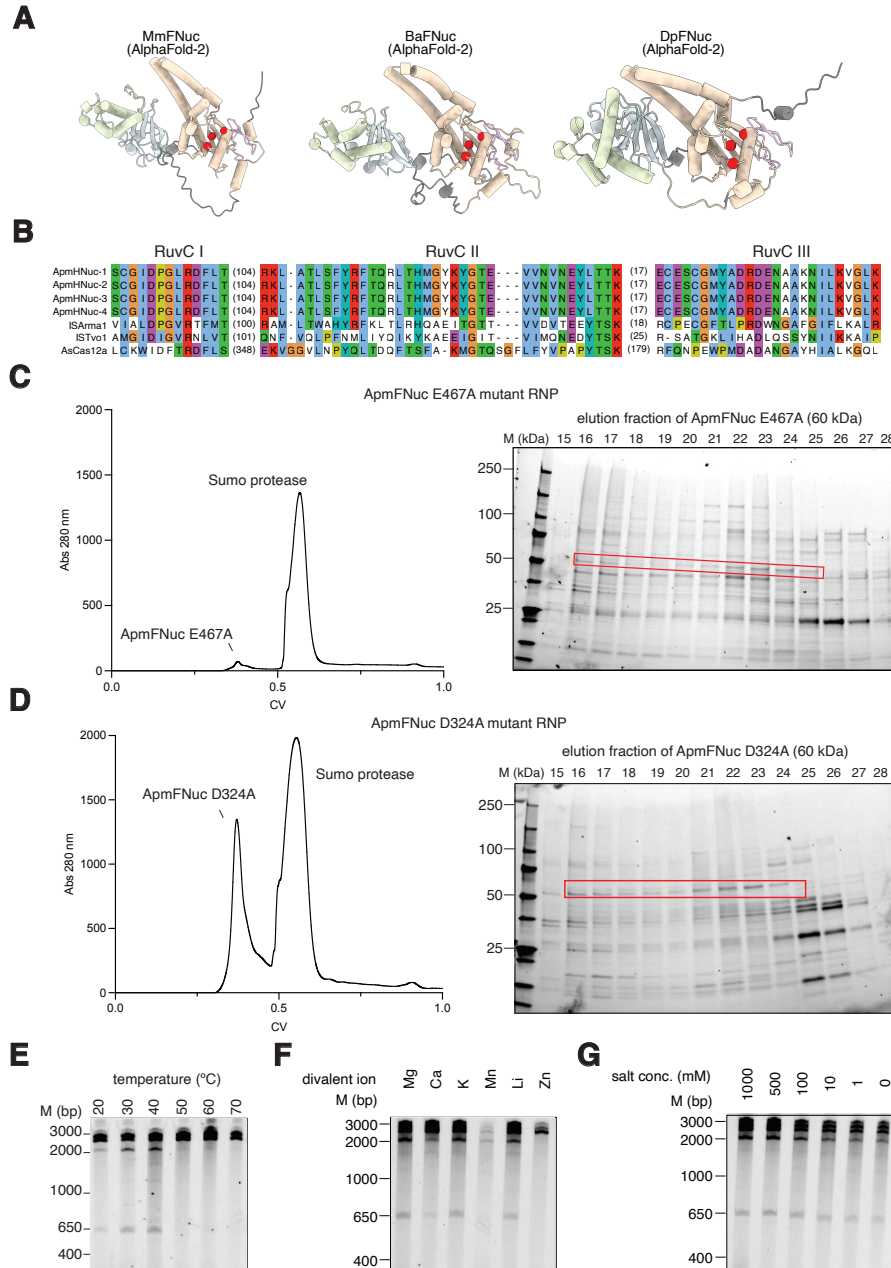

**Fig. S7: Further characterization of ApmFNuc nuclease activity.**

A) Predicted AlphaFold-2 structures of MmFNuc, DpFNuc, and BaFNuc showing that despite having a rearranged glutamate in the RuvC catalytic domain, the catalytic aspartates and glutamates form a putative active catalytic triad (red residues). B) Alignment of ApmFNuc RuvC domain with Isdra2TnpB RuvC domain to nominate the catalytic RuvC-I aspartic acid (D324) and the RuvC-II glutamic acid (E467A). C) FPLC traces of ApmFNuc E467A mutant purified with its fRNA and protein gels showing each fraction's protein products with the desired protein product that was pooled shown with a red square. D) FPLC traces of ApmFNuc D324A mutant purified with its fRNA and protein gels showing each fraction's protein products with the desired protein product that was pooled shown with a red square. E) Native TBE gel showing nuclease activity of ApmFNuc at temperatures from 10 to 65 degrees Celsius. Reactions were carried out by incubating wild-type ApmFNuc RNP on a plasmid with the TGGG TAM 5' adjacent to the 11

nt spacer target. Cleavage was visualized by gel electrophoresis. F) Native TBE gel showing nuclease activity of ApmFNuc with different cations supplemented into the cleavage buffer. Reactions were carried out by incubating wild-type ApmFNuc RNP on a plasmid with the TGGG TAM 5' adjacent to the 21 nt spacer target. Cleavage was visualized by gel electrophoresis. G) Native TBE gel showing nuclease activity of ApmFNuc with different NaCl salt concentrations supplemented into the cleavage reaction buffer. Reactions were carried out by incubating wild-type ApmFNuc RNP on a plasmid with the TGGG TAM 5' adjacent to the 21 nt spacer target. Cleavage was visualized by gel electrophoresis.

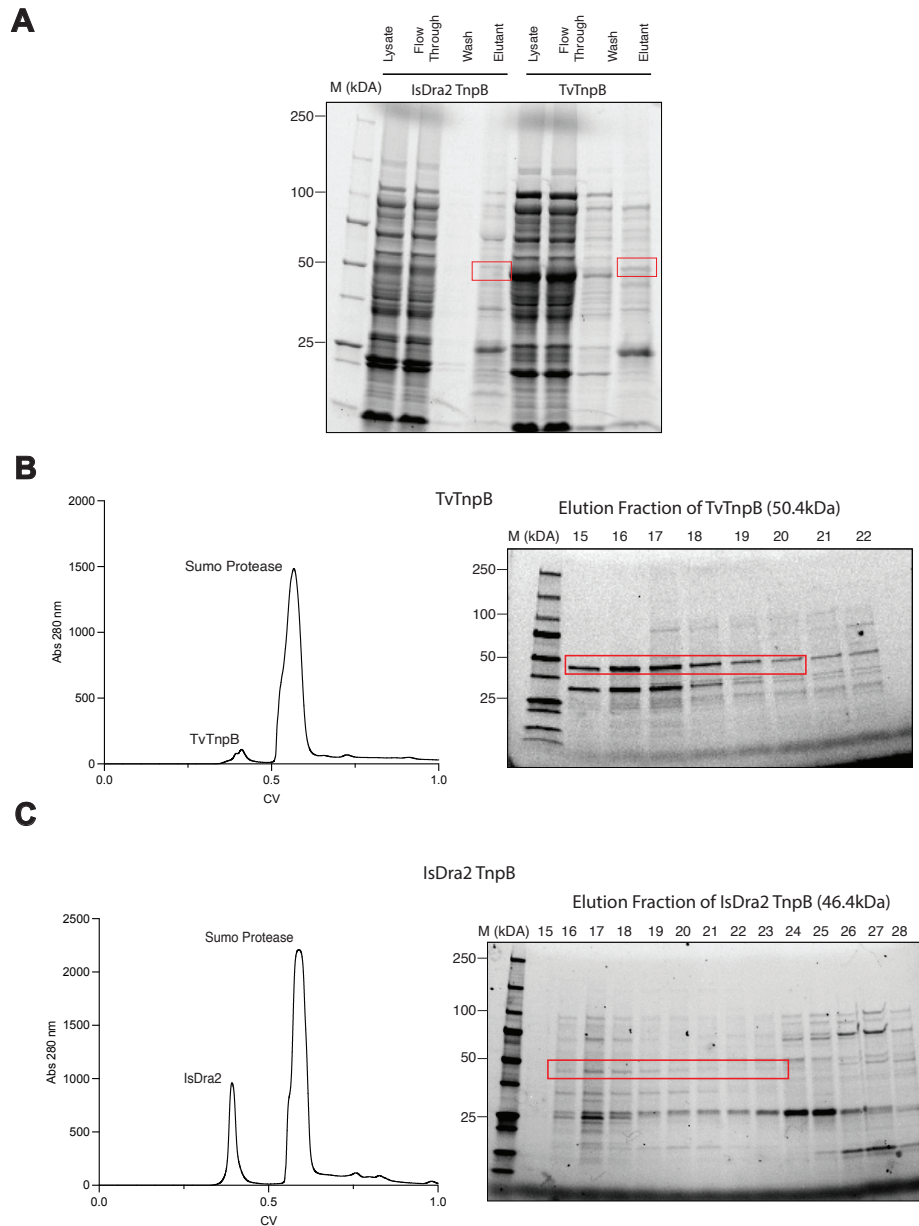

**Fig. S8: Purification of Isdra2TnpB and TvTnpB.**

A) Protein gel showing flowthrough and eluent fractions of Isdra2TnpB and TvTnpB products during gravity flow strep-bead purifications. The desired protein product is shown via a red square. B) FPLC traces of TvTnpB purified with its  $\omega$ RNA and protein gels showing each fraction's protein products with the desired protein product that was pooled shown with a red square. C) FPLC traces of Isdra2TnpB purified without its  $\omega$ RNA and protein gels showing each fraction's protein products with the desired protein product that was pooled shown with a red square.

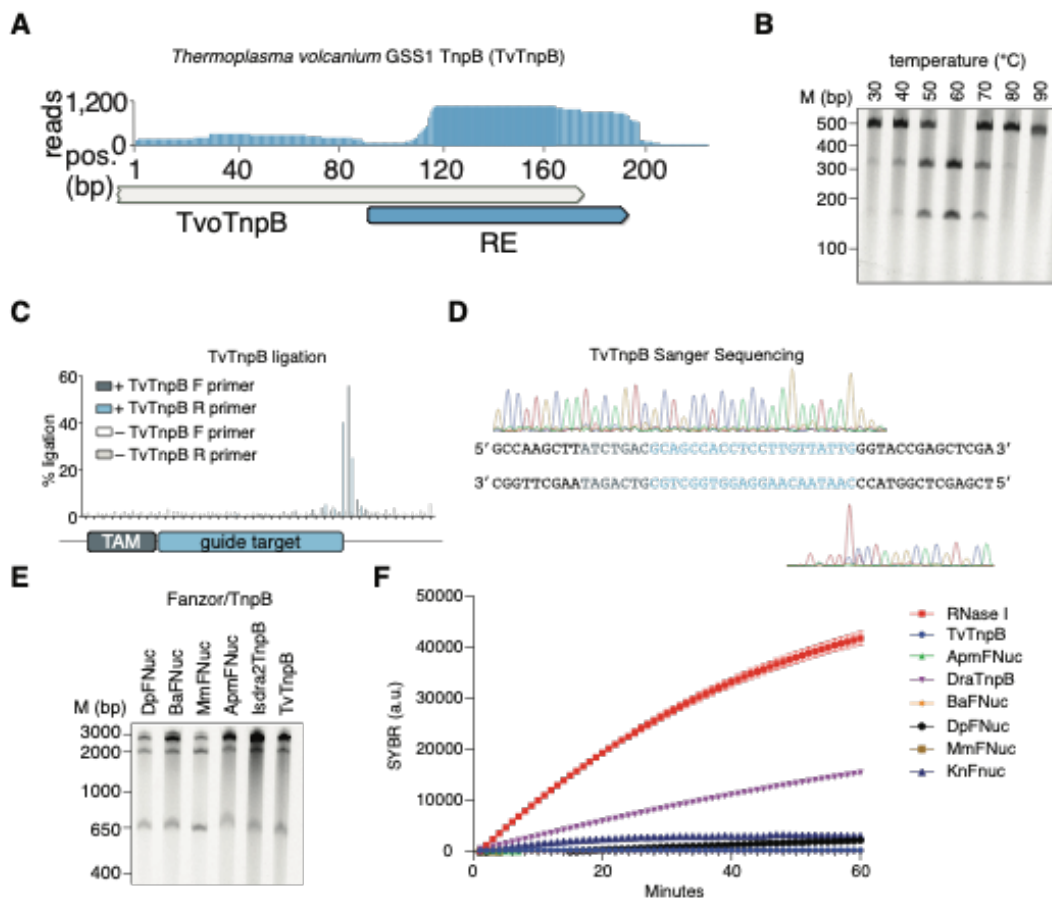

**Fig. S9: Characterization of TvTnpB and collateral activity comparisons.**

A) Expression of the non-coding RNA for TvTnpB, revealing a specific non-coding RNA species that associates with the TvTnpB protein extending from the ORF to outside the RE element similar to Isdra2TnpB. B) TvTnpB DNA cleavage of a 21 nt target containing a 5' ATGAC TAM at temperatures ranging from 30 degrees Celsius to 90 degrees Celsius, showing optimal cleavage reaction temperature near 60 degrees for TvTnpB. C) Next-generation sequencing mapping of the TAM cleavage by TvTnpB via adaptor ligation. Reads were aligned to the TAM target to map cleavage locations. Two separate reactions were ran in parallel with and without addition of TvTnpB RNP. The cleavage products were amplified in both 5' and 3' directions with F denoting 3' direction and R denoting the 5' direction. D) Sanger sequencing traces of TvTnpB cleavage on a 5' CTGAC TAM target, showing cleavage at the end of the target. E) On target cleavage activity of TvTnpB, Isdra2TnpB, MmFNuc, BaFNuc, DpFNuc, and ApmFNuc. Nucleases were incubated with plasmids containing their preferred TAM site and on-target guide RNA sequences for 1 hour of cleavage and subsequently visualized on a native TBE gel for comparison of on-target cleavage activity. F) Fluorescent signal from RNase alert reporter detection of RNA collateral cleavage activity from RNase A, TvTnpB, Isdra2TnpB, MmFNuc, BaFNuc, DpFNuc, and ApmFNuc incubated with their target DNA sequences for 1 hour. The signal is normalized to a no DNA target condition

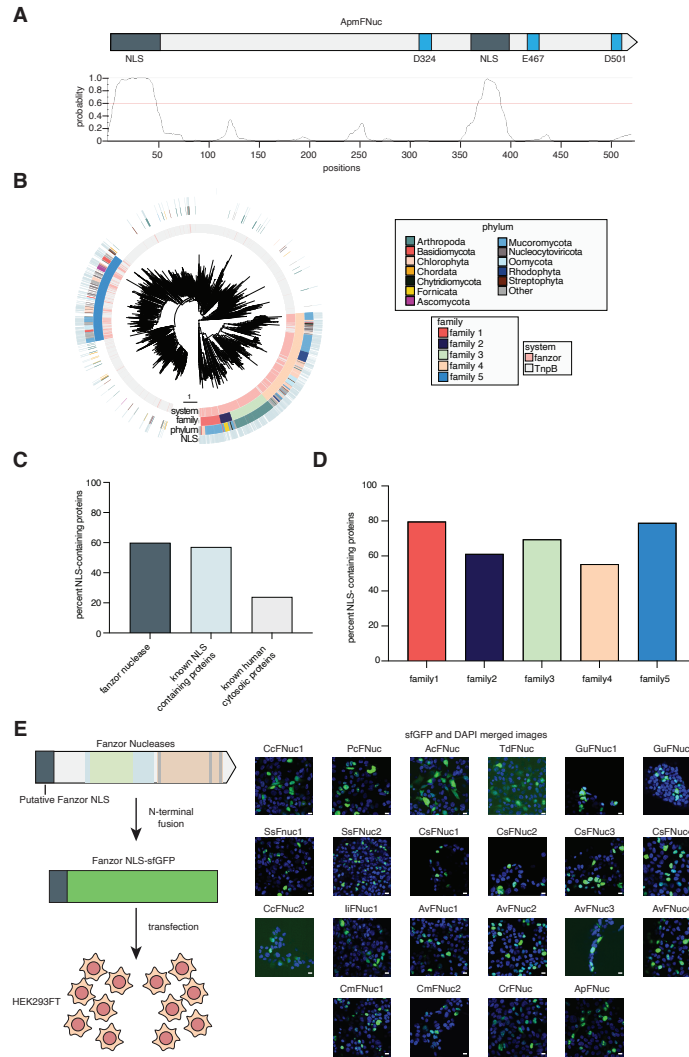

**Fig. S10: Characterization of Fanzor nuclear localization signals.**

A) Probability distribution of potential NLS elements across the ApmFNuc protein sequence as predicted by NLStradamus(13). The default cutoff at 0.6 is used to call significant NLS like elements, revealing one N-terminal NLS and one internal NLS. B) Phylogenetic tree of Fanzor nucleases and TnpB orthologs, with rings marking the host phyla and family designations of the Fanzor orthologs and which proteins were predicted to have an NLS sequence. C) A bar plot depicting NLS prediction rates on a set of known human cytosolic proteins (negative control), a set of known NLS containing proteins (positive control), and all Fanzor nucleases. D) Per family breakdown of NLS containing Fanzor predictions for Fanzor families 1-5. E) Confocal images of 22 different Fanzor nuclease N-terminal NLS predictions fused to sfGFP and transfected into HEK293FT cells for visualization of nuclear localization of the sfGFP. DAPI is used to stain the nucleus and images are shown with the GFP and DAPI channel signals merged. Scale bar, 20  $\mu$ m.

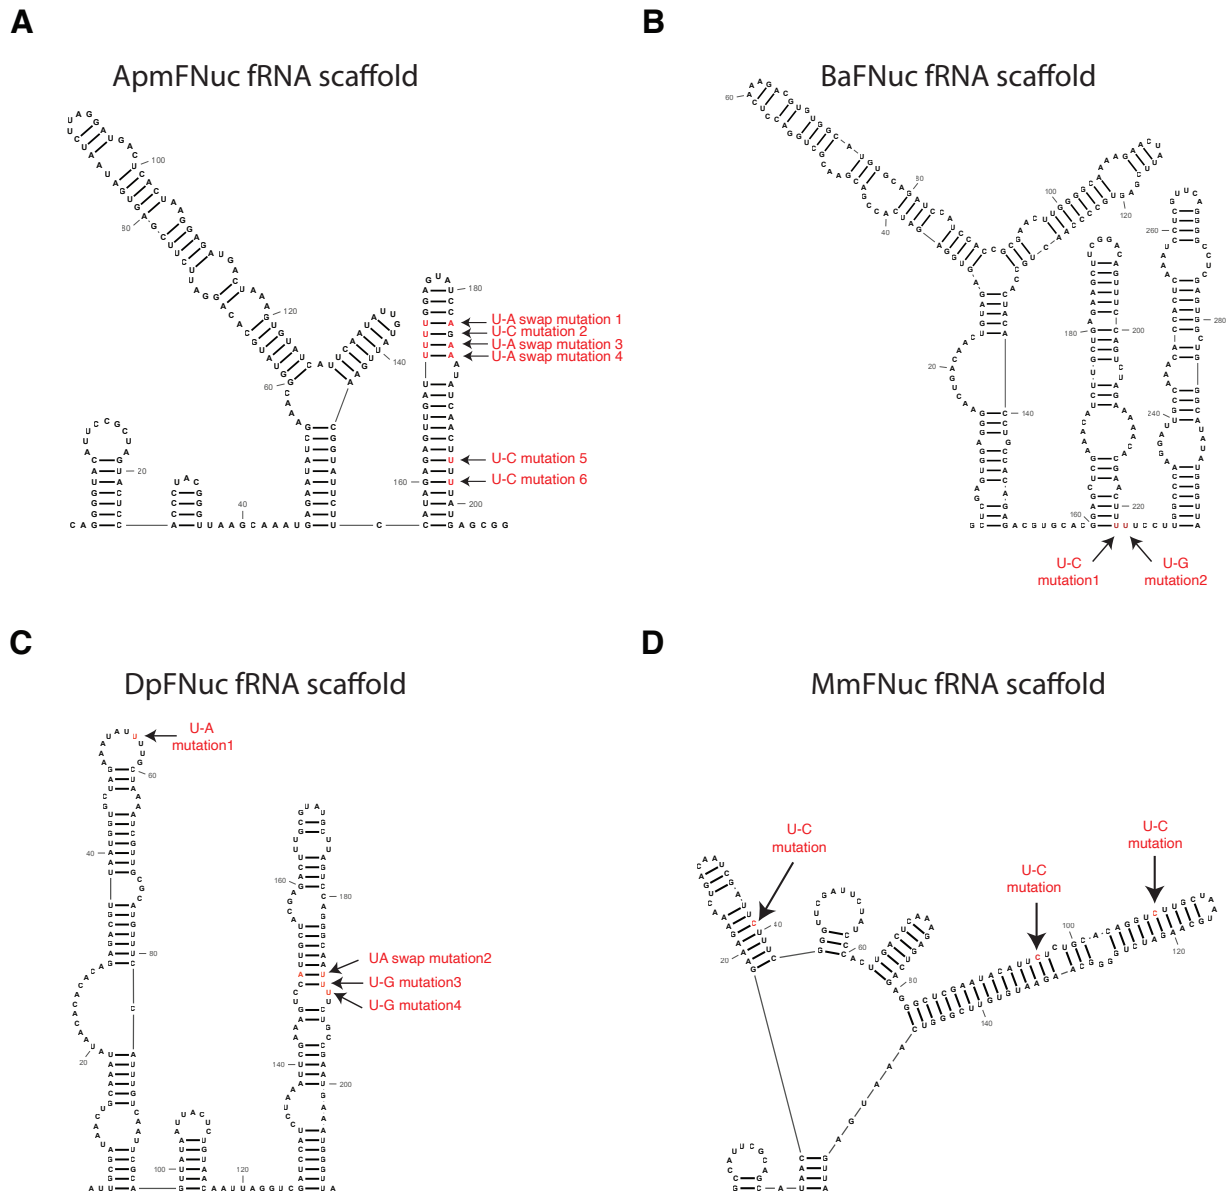

**Fig. S11: Schematic of engineered fRNA scaffolds for mammalian genome editing.** fRNA secondary structures are predicted by viennaRNA fold for A) ApmFNuc, B) BaFNuc, C) DpFNuc and D) MmFNuc. Mutated residues are labeled in red color and the arrows pointing to each base denote the nucleic acid mutations introduced at the specific position.

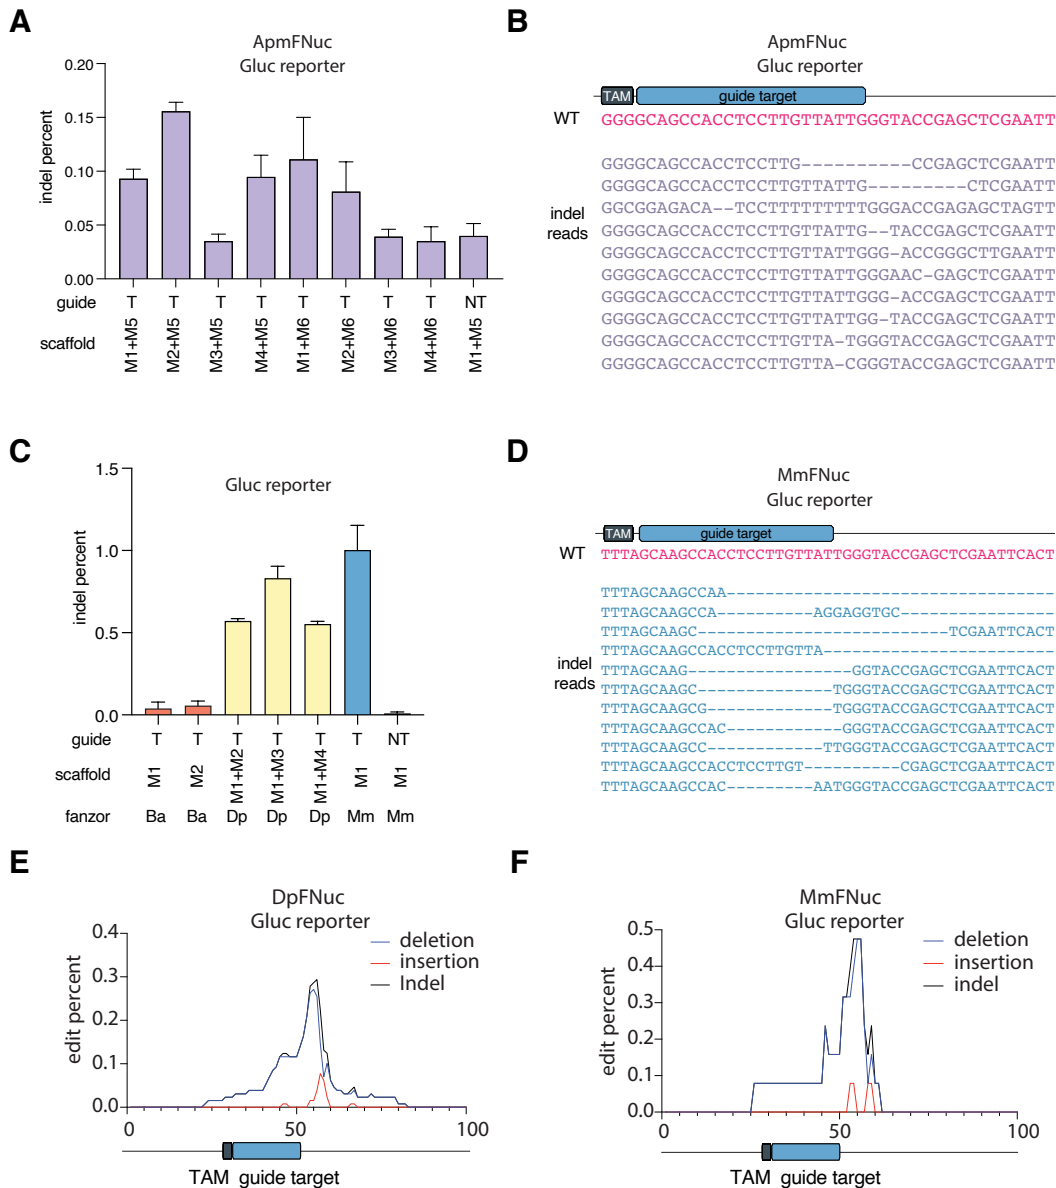

**Fig. S12: Characterization of Fanzor nuclease plasmid reporter editing in HEK293FT cells.**

A) An ApmFNuc mammalian expression vector and its fRNA U6 expression plasmid are co-transfected into HEK293FT cells targeting a luciferase plasmid reporter. Different mutations on the wild-type fRNA scaffold are introduced as shown in fig. S11 to eliminate poly-U stretches in the fRNA. Indel frequency is measured by next-generation sequencing with targeted primers on the plasmid reporter. B) Representative indel alleles from the M2+M5 scaffold targeting guide condition on the luciferase reporter, showing deletions centered around the 3' end of the guide target. C) Indel frequency on the luciferase plasmid reporter for BaFNuc, MmFNuc, and DpFNuc with different engineered fRNA scaffolds. D) Representative indel alleles for MmFNuc with the M1 fRNA scaffold targeting the luciferase reporter plasmid, showing deletions centered

around the 3' end of the guide target. E) Quantification of insertion, deletion and combined indel frequencies generated on the plasmid reporter by DpFNuc with the (M1+M3) scaffold targeting guide condition. Rates are shown per base throughout the quantification window of the amplicon. F) Quantification of insertion, deletion and combined indel frequencies generated on the plasmid reporter by MmFNuc with the targeting guide condition. Rates are shown per base throughout the quantification window of the amplicon.





**Table S1. *Fanzor* families in eukaryotic genomes and their identified transposon associations.**

*Fanzor* elements are named after the host species. *Fanzor2* elements are indicated by \*. The left and right termini are indicated by L. and R. respectively, in the orientation of the encoded *Fanzor* protein. N: none; n.a.: not available; i.c.: incomplete. #: The encoded Tpnase (or coding sequences). If a given *Fanzor* element does not encode Tpnase, but the superfamily it belongs to can be determined, the superfamily name is parenthesized. Rows highlighted in white correspond to *Fanzor*-Transposon associations previously identified (5). Rows highlighted in orange correspond to new transposon associations identified in this study.

| Family (bp)          | Copy No. | Termini | TIR (bp) | TSD (bp) | Fanzor protein (aa) & (No. Exons) | Tpnase # (Superfamily) | Comments            |
|----------------------|----------|---------|----------|----------|-----------------------------------|------------------------|---------------------|
| <i>MDe-1</i>         | 2        |         |          |          | 815 (3)                           |                        |                     |
| <i>MDe-2</i>         | 2        |         |          |          | 698 (4)                           |                        |                     |
| <i>MDe-3</i>         | 1        |         |          |          | 620 (4)                           |                        |                     |
| <i>MDe-4</i>         | 4        | L.R.    | N        | n.a.     | 731 (4)                           |                        |                     |
| <i>MDe-5</i>         | 4        | L.R.    | N        | n.a.     | 656 (4)                           |                        |                     |
| <i>MDe-6</i> (3852)  | 10       | L.R.    | N        | n.a.     | 661 (4)                           |                        |                     |
| <i>MDe-7</i> (3937)  | 8        | L.R.    | 24       | 2 (TA)   | 772 (3)                           |                        |                     |
| <i>MDe-8</i>         | 4        | R.      |          |          | 745 (3)                           |                        |                     |
| <i>MDe-9</i>         | 3        | R.      |          |          | 764 (5)                           |                        |                     |
| <i>MDe-10</i>        | 1        |         |          |          | 779 (3)                           |                        |                     |
| <i>MDe-11</i>        | 3        | R.      |          |          | 713 (4)                           |                        |                     |
| <i>MDe-12</i> (3875) | 5        | L.R.    | N        | n.a.     | 677 (4)                           |                        |                     |
| <i>MDe-13</i>        | 3        | R.      |          |          | 680 (2)                           |                        |                     |
| <i>HMa-1</i>         | 1        |         |          |          | i.c.                              | Mariner                | Probably from virus |
| <i>SAL-1</i> *       | 3        | R.      |          |          | 400 (1)                           |                        |                     |
| <i>SAL-2</i> *       | 3        | R.      |          |          | 498 (4)                           |                        |                     |
| <i>SPu-1</i> (2149)  | 25       | L.R.    | 33       | 2 (TA)   | 633 (1)                           |                        |                     |
| <i>SPu-2</i>         | 2        |         |          |          | 663 (1)                           |                        |                     |
| <i>SPu-3</i> (2288)  | 2        | L.R.    | 25       | 2 (TA)   | 626 (1)                           |                        |                     |
| <i>ROR-1</i> (5190)  | 10       | L.R.    | 90       | 2 (TA)   | 928 (3)                           | Mariner                |                     |

|                       |    |      |     |           |             |           |  |
|-----------------------|----|------|-----|-----------|-------------|-----------|--|
| <i>ROr-2</i> (4073)   | 18 | L.R. | 46  | 2 (TA)    | 690 (2)     | Mariner   |  |
| <i>ROr-3</i> (2862)   | 16 | L.R. | 133 | 2 (TA)    | 720 (2)     |           |  |
| <i>ROr-4</i> (5244)   | 9  | L.R. | 38  | 9         | 1165<br>(3) | (MuDr)    |  |
| <i>AMa-1</i>          | 1  |      |     |           | 871 (4)     |           |  |
| <i>AMa-2</i>          | 1  |      |     |           | 645 (3)     |           |  |
| <i>AMa-3</i>          | 1  |      |     |           | 789 (7)     |           |  |
| <i>PBl-1</i> (3938)   | 4  | L.R. | 12  | 3 (TAN)   | 683 (4)     |           |  |
| <i>PBl-2</i>          | 3  |      |     |           | 677 (2)     |           |  |
| <i>PBl-3</i> (4614)   | 6  | L.R. | 42  | 9         | 1186<br>(3) | (MuDr)    |  |
| <i>MCi-1</i> (4036)   | 4  | L.R. | 20  | 2 (TA)    | 686 (2)     | Mariner   |  |
| <i>MCi-2A</i> (10235) | 3  | L.R. | N   | 11        | 1375<br>(4) | Crypton   |  |
| <i>MCi-2B</i>         | 2  | R.   | -   | -         | 1375<br>(4) |           |  |
| <i>MCi-2C</i>         | 3  | R.   | -   | -         | 1375<br>(4) |           |  |
| <i>MCi-2D</i> (9295)  | 2  | L.R. | N   | 12        | 1375<br>(4) |           |  |
| <i>MCi-3</i> (5305)   | 2  | L.R. | 39  | 4? (TTAA) | 1304<br>(2) |           |  |
| <i>MCi-4</i> (4508)   | 6  | L.R. | 31  | 9         | 1245<br>(3) | (MuDr)    |  |
| <i>MCi-5</i> (7323)   | 5  | L.R. | N   | n.a.      | 1212<br>(3) | Harbinger |  |
| <i>MCi-6</i>          | 2  |      |     |           | 1231<br>(2) |           |  |
| <i>MCi-7</i>          | 1  | R.   |     |           | 1153<br>(3) |           |  |
| <i>MCi-8</i>          | 1  |      |     |           | 1067<br>(2) |           |  |

|                      |      |      |    |        |              |            |           |
|----------------------|------|------|----|--------|--------------|------------|-----------|
| <i>MCi-9</i>         | 1    |      |    |        | 1149<br>(3)  |            |           |
| <i>MCi-10</i>        | 1    |      |    |        | 1135<br>(4)  |            |           |
| <i>AGo-1*</i>        | 1    |      |    |        | 457 (1)      |            |           |
| <i>ECy-1*</i>        | 1    |      |    |        | 455 (1)      |            |           |
| <i>SCe-1*</i>        | 1    |      |    |        | 350 (1)      |            |           |
| <i>TDe-1*</i> (1785) | 7    | L.R. |    |        | 486 (1)      |            |           |
| <i>DFa-1</i> (11949) | 12   | L.R. | 12 | 4      | 1241<br>(10) | (Sola2)    |           |
| <i>DFa-2</i> (12887) | 7    | L.R. | 12 | 4      | 1010<br>(9)  | Sola2      |           |
| <i>DFa-3</i> (10254) | 2    | L.R. | 13 | 4      | 1084<br>(10) | (Sola2)    |           |
| <i>DFa-4</i>         | 1    |      |    |        | 1020<br>(13) | -          |           |
| <i>PPa-1</i> (13566) | 3    | L.R. | 22 | 4      | 1699<br>(7)  | Sola2      |           |
| <i>PPa-2</i>         | 1    |      |    |        | 945 (8)      |            |           |
| <i>PPa-3</i>         | 1    |      |    |        | 970 (9)      |            |           |
| <i>PPa-4</i> (14423) | 3    | L.R. | 16 | 4      | 1827<br>(14) | Sola2      |           |
| <i>PPa-5</i> (15292) | 3    | L.R. | 16 | 4      | 1388<br>(12) | Sola2      |           |
| <i>PPa-6</i>         | 2    | R.   | 16 | 4      | 1218<br>(13) |            |           |
| <i>PPa-7</i>         | 1    |      |    |        | 1756<br>(16) |            |           |
| <i>ACa-1*</i> (2675) | 2    | L.R. | N  | 0      | 603 (1)      | TnpA_IS607 |           |
| <i>ACa-2*</i>        | 1    |      |    |        | 653 (1)      | TnpA_IS607 |           |
| <i>VCa-1</i>         | 1    |      |    |        | 768 (1)      |            |           |
| <i>VCa-2</i>         | 1    |      |    |        | i.c.         |            |           |
| <i>CRa-1</i> (3992)  | >100 | L.R. | N  | 0 or n | 830 (5)      | (Helitron) | Expressed |

|                       |      |      |    |        |             |            |           |
|-----------------------|------|------|----|--------|-------------|------------|-----------|
| <i>CRe-2</i> (4882)   | >100 | L.R. | N  | 0 or n | 906<br>(10) | (Helitron) | Expressed |
| <i>CRe-3</i> (4688)   | >100 | L.R. | N  | 0 or n | 967<br>(10) | (Helitron) | Expressed |
| <i>CRe-4</i>          | 3    | R.   |    |        | 944 (6)     |            |           |
| <i>CRe-5</i>          | 3    | R.   |    |        | i.c.        |            |           |
| <i>CVu-1</i>          | n.a  |      |    |        | i.c.        |            |           |
| <i>CMe-1A</i> (3169)  | 150  | L.R. | N  | n.a.   | 734 (1)     |            |           |
| <i>PUL-1</i> (3620)   | 8    | L.R. | 24 | 2 (TA) | 802 (1)     | Mariner    |           |
| <i>PUL-2</i> (3820)   | 1    | L.R. | 33 | 2 (TA) | 643 (3)     | Mariner    |           |
| <i>PUL-3</i>          | 1    |      |    |        | 799 (1)     |            |           |
| <i>PUL-4</i> (3356)   | 3    | L.R. | 26 | 2 (TA) | 809 (1)     |            |           |
| <i>PUL-5</i>          | 1    | R.   |    |        | 617 (1)     |            |           |
| <i>PUL-6</i>          | 5    | R.   |    |        | 642 (1)     |            |           |
| <i>NOc-1</i>          | 4    |      |    |        | i.c.        |            |           |
| <i>PSo-1</i>          | 2    | R.   |    |        | 660 (1)     |            |           |
| <i>PSo-2</i>          | 4    | R    |    |        | 726 (1)     |            |           |
| <i>PSo-3</i>          | 3    |      |    |        | 716 (1)     |            |           |
| <i>PSo-4</i>          | 3    |      |    |        | 785         |            |           |
| <i>PSo-5*</i>         | 1    |      |    |        | i.c.        |            |           |
| <i>PCa-1,</i>         | 2    | R.   |    |        | 788 (1)     |            |           |
| <i>PCa-2</i> (2107)   | 2    | L.R. | N  | N      | 611 (1)     |            |           |
| <i>PCa-3*</i>         | 2    | R.   |    |        | 483         |            |           |
| <i>PRa-1</i>          | 1    |      |    |        | i.c.        |            |           |
| <i>PRa-2*</i>         | 2    | R.   |    |        | i.c.        |            |           |
| <i>ALa-1</i>          | 1    |      |    |        | i.c.        |            |           |
| <i>ALa-2</i>          | 1    |      |    |        | i.c.        |            |           |
| <i>ESvi-1A</i> (3180) | 1    | L.R. | 59 |        | 890 (1)     |            |           |
| <i>ESvi-1B</i> (4052) | 1    | L.R. | 25 | 8      | 890 (1)     | IS4        |           |
| <i>ESv-1</i> (2639)   | 2    | L.R. | 40 | 2 (TA) | 693 (1)     |            |           |
| <i>ESv-2</i> (3603)   | 2    | L.R. | 18 |        | 757 (1)     | IS4        |           |
| <i>SWv-1</i> (2633)   | 1    | L.R. | 21 | 6      | 779 (1)     |            |           |

|                          |     |      |       |                |         |            |                                   |
|--------------------------|-----|------|-------|----------------|---------|------------|-----------------------------------|
| <i>HAgv-1</i> (1963)     | 2   | L.R. | 13    | 4 (TTAT)       | 572 (1) |            |                                   |
| <i>HAmv-1</i> (1925)     | 1   | L.R. | 13    | 4 (TTAA)       | 592 (1) |            |                                   |
| <i>PUgv-1</i> (1961)     | 2   | L.R. | 13    | 4 (TTAT)       | 571 (1) |            |                                   |
| <i>SFav-1</i> (1954)     | 2   | L.R. | 13    | 4 (TTAN)       | 606 (1) |            |                                   |
| <i>HVav-1</i> (1955)     | 5   | L.R. | 13    | 4 (TTAN)       | 608 (1) |            |                                   |
| <i>MCnv-1</i>            | 1   | R.   |       |                | i.c.    |            |                                   |
| <i>PGv-1</i> (4442)      | 1   | L.R. | 29    | 2 (TA)         | 625 (1) | Mariner    |                                   |
| <i>EHv88-1</i>           | 1   |      |       |                | 650 (1) |            |                                   |
| <i>EHv99B1-1*</i> (2126) | 1   | L.R. |       |                | 640 (1) |            |                                   |
| <i>ISvMimi 1*</i> (2549) | 3   | L.R. |       |                | 520 (1) | TnpA_IS607 | = <i>APmv-2</i> , = <i>ACmv-2</i> |
| <i>ISvMimi 2*</i>        | 1   |      |       |                | 545 (1) | TnpA_IS607 | = <i>APmv-1</i> , = <i>ACmv-1</i> |
| <i>APmv-3*</i>           | 1   |      |       |                | 482 (1) |            | = <i>ACmv-3</i>                   |
| <i>MGvc-1*</i> ,         | 1   |      |       |                | 526 (1) |            |                                   |
| <i>MGvc-2*</i>           | 1   |      |       |                | 493 (1) |            |                                   |
| <i>ISvAR158 1*</i>       | 1   |      |       |                | 351 (1) | TnpA_IS607 |                                   |
| <i>ISvNY2A 1*</i> (2164) | 3   | L.R. |       |                | 395 (1) | TnpA_IS607 |                                   |
| <i>ISvNY2A 2*</i> (1443) | 2   | L.R. |       |                | 432 (1) |            |                                   |
| <i>CRv-1*</i>            | 1   |      |       |                | 416 (1) | TnpA_IS607 |                                   |
| <i>FEsv-1*</i>           | 1   |      |       |                | 408 (1) |            |                                   |
| <i>Fanzor1-1 SitMos</i>  | >12 | L.R. | 11-bp | 2-bp (NN)      | (3)     | EnSpm?     |                                   |
| <i>Fanzor1-2 SitMos</i>  | >8  | L.R. | 74    | 8 (ATGTANNN)   | (5)     | hAT        |                                   |
| <i>Fanzor1-3 SitMos</i>  | >14 | L.R. | 12    | 8              | (5)     | hAT        |                                   |
| <i>Fanzor1-4 SitMos</i>  | 1   | -    | -     |                |         |            | fragmental                        |
| <i>Fanzor1-5 SitMos</i>  | 6   | R.   | -     | -              |         | Helitron?  |                                   |
| <i>Fanzor1-6 SitMos</i>  | >10 | L.R. | 21    | 2-bp (NN)      |         | EnSpm?     |                                   |
| <i>Fanzor1-7 SitMos</i>  | 6   | L.R. | 127   | 8 GT(GTGNNNNN) | (4)     | hAT        |                                   |
| <i>Fanzor1-8 SitMos</i>  | >7  | L.R. | 12    | 2-bp (NN)      | (3)     | EnSpm?     |                                   |
| <i>Fanzor1-9 SitMos</i>  | >16 | R.   | -     | -              | (4)     |            | fragmental                        |
| <i>Fanzor1-10 SitMos</i> | >9  | R.   | -     | -              |         |            | fragmental                        |
| <i>Fanzor1-11 SitMos</i> | 1   | -    | -     |                |         |            |                                   |
| <i>Fanzor1-1 ConNas</i>  | >20 | L.R. | 12    | 2              |         | EnSpm?     |                                   |
| <i>Fanzor1-2 ConNas</i>  | >6  | L.R. | 12    | 2              |         | EnSpm?     |                                   |

|                          |     |       |      |              |     |           |  |
|--------------------------|-----|-------|------|--------------|-----|-----------|--|
| <i>Fanzor1-3_ConNas</i>  | >50 | L.R.  | 12   | 2            | (2) | EnSpm?    |  |
| <i>Fanzor1-4_ConNas</i>  | >20 | L.R.  | 11   | 2            | (3) | EnSpm?    |  |
| <i>Fanzor1-5_ConNas</i>  | >7  | L.R.  | 11   | 2            | (3) | EnSpm?    |  |
| <i>Fanzor1-6_ConNas</i>  | >10 | L.R.  | 133  | 8 (ATGTANNN) | (5) | hAT       |  |
| <i>Fanzor1-7_ConNas</i>  | >3  | L.R.  | 126  | 8 (GTGNNNNN) | (3) | hAT       |  |
| <i>Fanzor1-8_ConNas</i>  | >8  | L.R.  | 12   | 2            | (4) | EnSpm?    |  |
| <i>Fanzor1-9_ConNas</i>  | >13 | L.R.  | 126  | 8 (ATGTANNN) | (3) | hAT       |  |
| <i>Fanzor1-10_ConNas</i> | >6  | L.R.  | none | 8 (GCANNNNN) | (4) | hAT?      |  |
| <i>Fanzor1-11_ConNas</i> | >10 | L.R.  | 133  | 8 (ATGTANNN) | (5) | hAT       |  |
| <i>Fanzor1-12_ConNas</i> | >10 | L.R.  | 130  | 8 (ATGTANNN) | (3) | hAT       |  |
| <i>Fanzor1-13_ConNas</i> | >11 | L.R.  | 72   | 2 (TA)       | (4) | EnSpm?    |  |
| <i>Fanzor1-14_ConNas</i> | >4  | L.R.  | 12   | 2 (TA)       | (3) | EnSpm?    |  |
| <i>Fanzor1-15_ConNas</i> | >3  | L.R.  | 16   | 8 (GGTANNNN) | (1) | hAT?      |  |
| <i>Fanzor1-16_ConNas</i> | >3  | L.R.  | none | 8 (GGTANNNN) | (6) | hAT?      |  |
| <i>Fanzor1-17_ConNas</i> | >2  | L.R.  | 15   | 8 (GGTANNNN) | (3) | hAT?      |  |
| <i>Fanzor1-18_ConNas</i> | >20 | R.    |      |              |     |           |  |
| <i>Fanzor1-19_ConNas</i> | >4  | L.R.  | 121  | 8 (ATGTANNN) | (4) | hAT       |  |
| <i>Fanzor1-1_ApoVar</i>  | >16 | L.R.  | none | 0            | (7) | Crypton   |  |
| <i>Fanzor1-2_ApoVar</i>  | 12  | L.R.  | none | 0            |     | Crypton?  |  |
| <i>Fanzor1-3_ApoVar</i>  | >4  | L.R.  | none |              |     | Helitron  |  |
| <i>Fanzor1-4_ApoVar</i>  | >11 | L.R.  | none |              |     | Crypton   |  |
| <i>Fanzor1-5_ApoVar</i>  | >6  | L.R.  | none |              |     | Helitron  |  |
| <i>Fanzor1-6_ApoVar</i>  | >6  | L?.R. | none |              |     | Helitron? |  |

|                                   |     |       |                             |          |     |             |  |
|-----------------------------------|-----|-------|-----------------------------|----------|-----|-------------|--|
| <i>Fanzor1-7_ApoVar</i>           | >5  | L.R.  | none                        |          |     | Helitron    |  |
| <i>Fanzor1-8_ApoVar</i>           | >5  | L.R.  |                             | TA       |     | Mariner     |  |
| <i>Fanzor1-8B_ApoVar</i>          | >5  | L.R.  |                             | TA       |     | Mariner     |  |
| <i>Fanzor1-9_ApoVar</i><br>(3996) | =4  | L.R.  | 19-bp                       | TA       |     | Mariner?    |  |
| <i>Fanzor1-1_RhiMic</i>           | 3   | L.R.  | 90                          | 2 (TA)   | (1) | Mariner?    |  |
| <i>Fanzor1-2_RhiMic</i>           | >3  | L.R.  | none                        | 2 (TA)   | 3   | Mariner (+) |  |
| <i>Fanzor1-3_RhiMic</i>           | >4  | L.R.  | none                        |          |     | Helitron    |  |
| <i>Fanzor1-4_RhiMic</i>           | ~4  | L.?R? | none                        |          |     |             |  |
| <i>Fanzor1-1_Mulr</i>             | ~3  | R.    |                             | 0        |     | Crypton     |  |
| <i>Fanzor1-2_Mulr</i>             | ~4  | L.R.  | 36                          | 9        | (5) | MuDR?       |  |
| <i>Fanzor1-3_Mulr</i>             | >4  | R.    |                             |          |     |             |  |
| <i>Fanzor1-4_Mulr</i>             | >3  | L.R.  |                             | 9        |     | MuDR?       |  |
| <i>Fanzor1-5_Mulr</i>             | >4  | L.R.  | Weak<br>subterminal<br>TIRs | 9        |     | MuDR?       |  |
| <i>Fanzor1-1_ParPar</i>           | >10 | L.R.  | none                        |          |     | Crypton     |  |
| <i>Fanzor1-2_ParPar</i>           | >10 | L.R.  | 142                         | 2 (TA)   |     |             |  |
| <i>Fanzor1-3_ParPar</i>           | >3  | L.R.  | 24                          | 3(TWA)   |     |             |  |
| <i>Fanzor2-1_ParPar</i><br>(1660) | >40 | L.R.  | 14                          | 4 (TTAA) |     |             |  |
| <i>Fanzor1-1_KleNit</i>           | >6  | L.R.  | 27                          | 2 (TA)   | (1) | Mariner     |  |
| <i>Fanzor1-1_KleNit</i>           | >5  | L.R.  | 27                          | ?        |     |             |  |
| <i>Fanzor1-1_ChIPri</i>           | >4  | L.?R? |                             |          |     |             |  |
| <i>Fanzor2-1_ChIPri</i><br>(2654) | >23 | L.R.  | 13                          | 5        |     |             |  |
| <i>Fanzor1-1_CarMem</i>           | =6  | L.R.  | none                        | 5        | 1   |             |  |
| <i>Fanzor1-2_CarMem</i>           | >6  | L.R.  | none                        | 5        | 1   |             |  |



|                                 |      |      |       |       |     |                      |                              |
|---------------------------------|------|------|-------|-------|-----|----------------------|------------------------------|
| <i>Fanzor1-3 CarMem</i>         | =3   | L.R. |       | 5     |     |                      |                              |
| <i>Fanzor1-1 MicYARC (3453)</i> | >100 | L.R. | 27    | 2(TA) | (1) | Mariner (+)          | Target CTA                   |
| <i>Fanzor1-1N1 MicYARC</i>      | >14  | L.R. | 27    | 2(TA) | (1) | Mariner              |                              |
| <i>Fanzor1-2 MicYARC</i>        |      | L.R. | 27    | 2(TA) | (1) | Mariner              | Target CATA                  |
| <i>Fanzor1-3 MicYARC</i>        | >16  | L.R. |       | 2(TA) |     | Mariner              |                              |
| <i>Fanzor1-4 MicYARC</i>        | >50  | L.R. | 32    | 2(TA) |     | Mariner (+ strand)   | Target GTTA, specific strand |
| <i>Fanzor1-5 MicYARC</i>        | >2   | L.R. |       | 2(TA) | (1) | Mariner(- strand)    | Target CATA, specific strand |
| <i>IS607EU-1 MicYARC</i>        | >20  | L.R. | none  | none  |     | IS607, S-recombinase |                              |
| <i>IS607EU-1 MicYARC (2163)</i> |      | L.R. |       |       |     | IS607, S-recombinase |                              |
| <i>Fanzor1-1_XesXan</i>         | >4   | L.R. |       | TTAA  |     | piggyBac (by TIR)    |                              |
| <i>Fanzor1-1 CycCry</i>         | >9   | L.R? | none  |       | >3  |                      | 88%                          |
| <i>Fanzor1-1 EreLig</i>         | =3   | L.R. | 17    | 4-bp  | 1   | piggyBac?            |                              |
| <i>Fanzor1-1 AbrTri (1873)</i>  | =7   | L.R. | 13-bp | 4-bp  |     | ?                    |                              |
| <i>Fanzor1-1_CydSpl (1931)</i>  | =5   | L.R. | 12-bp | 4-bp  | 1   |                      |                              |
| <i>Fanzor1-1 NeHa</i>           | >6   | L.R. |       | none  | 1   | Crypton??            | 14642-bp                     |
| <i>Fanzor1-2 NeHa</i>           | >3   | L.R. |       | none  |     |                      |                              |
| <i>Fanzor1-1 HypPro</i>         | >4   | L.R. | 9     | TTAA  | 1   | piggyBac ?           | Inserted with I-element.     |
| <i>Fanzor1-1_LysCor (2202)</i>  | =3   | L.R. | 10    | TTAA  | 1   | piggyBac ?           |                              |
| <i>Fanzor1-1 NeYa</i>           | >40  | R.   |       |       |     |                      |                              |

|                                |       |               |           |                  |   |                   |                                  |
|--------------------------------|-------|---------------|-----------|------------------|---|-------------------|----------------------------------|
| <i>IS607EU-h1_PhySoj</i>       | >2    | L.? R.        |           |                  |   |                   |                                  |
| <i>Fanzor1-6_PhySoj (2476)</i> | >2    | R.            |           |                  |   |                   |                                  |
| <i>IS607EU-1_UndPin</i>        | >3(*) | indeterminate |           |                  |   | IS607             | Integrated inside MuDR           |
| <i>Fanzor1-1_LepBou</i>        | >3    | L.R.          | 24-bp     | TA               | 1 | Mariner (by TIR)  | Target TGTA                      |
| <i>Fanzor1-2_LepBou</i>        | =2    | L.R.          | 33-bp     | Mostly TA        | 1 | EnSpm (by TIR)    |                                  |
| <i>Fanzor1-3_LepBou</i>        | =2    | L.R.          |           | 2-bp             | 1 | EnSpm (by TIR)    |                                  |
| <i>IS607EU-1_GiMa</i>          |       |               |           |                  |   | IS607             |                                  |
| <i>IS607EU-2_GiMa</i>          | >60   | L.R.          | none      | none             |   | IS607             | TnpB degraded.                   |
| <i>IS607EU-3_GiMa</i>          | >14   | L.R.          | none      | none             |   | IS607             |                                  |
| <i>Fanzor1-1_PilApi</i>        | >40   | L.R.          | 18-bp     | 4-bp             |   |                   |                                  |
| <i>Fanzor1-2_PilApi</i>        | =8    | L.R.          | none      | none             |   |                   |                                  |
| <i>Fanzor1-3_PilApi</i>        | >6    | L.R.          | 169-bp    | TA, likely       |   |                   | Old repeat, 86% identity         |
| <i>IS607EU-1_SchTIO01</i>      | >20   | L.R.          | none      | none             |   | IS607             |                                  |
| <i>Fanzor1-1_VerVer</i>        | >28   | L.R.          | 20        | 2-bp             |   |                   |                                  |
| <i>Fanzor1-1_EuLap</i>         | >7    | R.            |           |                  |   |                   |                                  |
| <i>Fanzor1-1_GuiThe (2751)</i> | =9    | L.R.          | 15-bp     | 4-bp (ATAN)      |   |                   |                                  |
| <i>Fanzor1-2_GuiThe (2714)</i> | >10   | L.R.          | none      | 4-bp (TTAW)      |   |                   | TnpB truncated at the C-terminal |
| <i>Fanzor1-3_GuiThe (2261)</i> | =1    | L.R.          | 18-bp     | 4-bp (predicted) |   |                   |                                  |
| <i>Fanzor1-1_ApoBC</i>         | ~4    | R.            | uncertain | uncertain        |   |                   |                                  |
| <i>Fanzor1-1_AphGif</i>        | =8    | R.            | uncertain | Uncertain        |   |                   | 5'-end is flexible.              |
| <i>Fanzor1-1_HemFu</i>         | =9    | L.R.          | 14-bp     | 4-bp TTAA        |   | piggyBac (by TIR) |                                  |

|                         |    |      |           |           |  |          |      |
|-------------------------|----|------|-----------|-----------|--|----------|------|
| <i>Fanzor1-1_MucSat</i> | >9 | L.R. | 27-bp     | 2-bp (TA) |  |          |      |
| <i>Fanzor1-1_BomMaj</i> | >4 | R.   | uncertain | uncertain |  |          |      |
| <i>Fanzor1-2_BomMaj</i> | =3 | R.   | uncertain | uncertain |  |          |      |
| <i>Fanzor1-1_RhiDel</i> | =3 | L.R. | 78-bp     | TA?       |  | Mariner? | TGTA |
| <i>Fanzor2-1_MerMer</i> | =4 | R.   |           |           |  | IS607?   |      |

**Table S2. Fanzor Protein and fRNA sequences used in this study**

| Fanzor/Tn pB systems | Fanzor/Tnp B types | Protein Sequence                                                                                                                                                                                                                                                                                                                                                                                                                                                                                                                                                                                                                                                     | Associated fRNA Scaffold Sequence for biochemistry (neglecting guide)                                                                                                                                                                                                                                                                                                          |
|----------------------|--------------------|----------------------------------------------------------------------------------------------------------------------------------------------------------------------------------------------------------------------------------------------------------------------------------------------------------------------------------------------------------------------------------------------------------------------------------------------------------------------------------------------------------------------------------------------------------------------------------------------------------------------------------------------------------------------|--------------------------------------------------------------------------------------------------------------------------------------------------------------------------------------------------------------------------------------------------------------------------------------------------------------------------------------------------------------------------------|
| ApmFNuc              | Fanzor2            | <p>MKEAVKKNVKKVPAKKRIITGSK<br/> TKKKVVFVKKKPPDKKPLKKPVKKT<br/> VKTYKLKSIYVSNKDLKMSKWIPT<br/> PKKEFTEIETNSWYHRKFENPN<br/> GSPIQSYNKIVPVVPPESIKQQNL<br/> ANKRKKTNRPVIFISSEKIRIYPTKE<br/> QQKILQTFWRLFACMYNSSIDYI<br/> NSKKVVLESGRINVAATRKCENKI<br/> SVRKALKTIRDNLKSTNPSIMTHI<br/> MDEAIGLACSNYKTCLTNYIEGQI<br/> KKFDIKPWSISKRRKIIVIEPGYFK<br/> GNSFCPTVFPKMKSSKPLIMIDKT<br/> VTLQYSDTRKYILFVPRVTPKYS<br/> VNKEKNSCGIDPGLRDFLTVYSE<br/> NETQSICPIEIVVNTTKNEYKKIDK<br/> INEIHKTPNLNSKRKKLNRGLRK<br/> YHRRVTNKMKDMHYKVSHEL<br/> NTFDKICIGKLNKSKANTVLK<br/> SALKRKLATLSFYRFTQRLTHMGY<br/> KYGTEVVNVNEYLTTKTCSNCGKI<br/> KDLGASKIYECESCGMYADRDEN<br/> AAKNILKVGLKPWYKQK</p> | <p>AAAAATAGTCTAATAAAATCAGGGGTACA<br/> TTCCGCTAGTACTCCACCCTACGGGTAAAG<br/> CAAATGAGAATATCGAAACGGTATGCACA<br/> GGATTCTTCGAGTGATAATCTTAGGATGAC<br/> TCACTAAGGAGATGACTAAAGTGTATCATT<br/> CAATATTGTATTGAACGGTATTCTCCATA<br/> GAGAGTTGATTTtGGAGTATCCAGAAATA<br/> TCAACTtTTTATGAGCGG</p>                                                                                              |
| DpFNuc               | Fanzor2            | <p>MKRKREDLTLWDAANVHKHKS<br/> MWYWWWEYIRRKDMVNHEKTD<br/> CDVIQLLQSASVKKQKTQSDKFLT<br/> SFSVGIRPTKHQKRVLNEMLRVS<br/> NYTYNWCLWLVNEKGLKPHQFE<br/> LQKIVCKTNANDVDPQYRMEND<br/> DWFFNKMSTSVKLTSCKNFCTS<br/> YKSAKSLKSKLRPMSVSNIIQGS<br/> FCVPKLFIRHLSSKDVSTDNTNM<br/> QNRICMMPDNFEKRSNPKERF<br/> LKLAKPITKIPPIDHDVKIVKRADG<br/> MFIMNIPCDPKYTRRNASNDTIE<br/> KRVCGIDPGGRTFATVYDPIDCC<br/> VFQVGIKEDKQYVISKLHNKIDHA<br/> HMHLTKAQNKKQQAARERIVS</p>                                                                                                                                                                                                                        | <p>ATTGGATGTTCAAATGAAGCATACACTTC<br/> GAAGACGTGTGGAGTGTGTGGAACAATA<br/> AACAAAAATCTAGAAAAGAGTGAAACATT<br/> TTATTGCGATAACTGCAAATATAACACACA<br/> CAGAGACGTTAATGGTGCTAGAAATATtTT<br/> GCTAAAATCGTTGCGCATGTTTCCATTTGT<br/> CAATTCGCAGTTATAATTACTCTGTAACAA<br/> TTAGGTCGATCCATCCTAAATTCGAAAGTC<br/> CATTGCTACGAGACTTTGCGTATGCTTAGT<br/> CCAGGGCAATtTTCTGCCGAATGAAATGG<br/> GTTA</p> |

|        |         |                                                                                                                                                                                                                                                                                                                                                                                                                                                                                                                                                                       |                                                                                                                                                                                                                                                                                                                                                    |
|--------|---------|-----------------------------------------------------------------------------------------------------------------------------------------------------------------------------------------------------------------------------------------------------------------------------------------------------------------------------------------------------------------------------------------------------------------------------------------------------------------------------------------------------------------------------------------------------------------------|----------------------------------------------------------------------------------------------------------------------------------------------------------------------------------------------------------------------------------------------------------------------------------------------------------------------------------------------------|
|        |         | LKKTHLKLKTFVDDIHLKLSHLVK<br>EYQYVALGKINVAQLVKTDRPKP<br>LSKRAKRDLLYWQHFRQRLTH<br>RTTNTECILDVQNEAYTSKTCGV<br>CGTINKNLEKSEFYCDQCKYNT<br>HRDVNGARNILLKSLRMFPFEKQ<br>QQ*                                                                                                                                                                                                                                                                                                                                                                                                   |                                                                                                                                                                                                                                                                                                                                                    |
| MmFNuc | Fanzor2 | MKRKREQMTLWKAQVNGQET<br>FKSWIDKARMELELNCVSSASST<br>HYSIDLNLKTKCAKMEDKFMCTFS<br>VGIRPTSKQKRTLQMLKVSNH<br>AYNWCNYLVKEKDFKPKQFDLQ<br>RVVTKNSTDVPAEYRLPGDDW<br>FFDNKMSSIKLTACKNFCTMYKS<br>AQTNQKTKVDLRNKDIAMLR<br>GSFEVQKKYVRLLEKIDIPDERIR<br>QSRIALMADNFSKSKKDWKERFL<br>RLSKNVSKIPPLSHDMKVCKRPN<br>GKFVQLQPCDPIYTRQIQVHTSDSI<br>CSIDPGGRTFATCYDPSNIKAFQI<br>GPEADKKEVIHKEYHEKIDYVHRL<br>AYAQQKKQTQAVQDRIGQLKLL<br>HLKLTQVDDVHLKLSYLVKNYK<br>LVVLGKISVSSIVRKDRPNHLAKK<br>ANRDLLCWQHFRQRLHRVR<br>GTDCEAIAQDERYTSKTCGNCGV<br>KNNKLGKETFICESCNYKTHRD<br>VNGARNILCKYLGLFPFAA* | ACTCCAAGACCTGTGGTAATTGCGGTGT<br>GAAGAACAACAACTTGGTGGAAAGGAA<br>ACGTTTACTTGTGAGTGTTGCAATTACAAA<br>ACTCATCGAGACGTCAACGGAGCGAGAAA<br>CATTCTGTGCAAATACTTGAACTTTTTCCA<br>TTCGCAGCATAACGAAAGAAACTGACAAT<br>CGATTTTTTCGGGTTTCGATTCTATCCCACTT<br>GACTCAAAGAGTCAGAGGGCTCGAATACA<br>TTTTCTGCACAGTTTTGCTAATGCAAGAT<br>CTGGGGCAAGAATGTGTTTCGGGTCAAATG<br>AGTTA |
| BaFNuc | Fanzor2 | MKRTYSATKSSLTLWTAASVKTT<br>SAPKVVTTFSGWMKKILPTRAET<br>SLTLINPADIADPSPPKKAKKTP<br>ATPKPTLRIYKIGLRPSAQRKTLN<br>ACIVAANFAYNQCVHLVQHKVC<br>KPHLYDLQKIVAKMKTPEDINHR<br>YAPDRDGFVFKSSTIVRLLATKD<br>FCAAYKAIVSNKKDVAVIKYKTY<br>DDPEAINPLSGLFGCQKQYATVT<br>QAGLRLPRLFGKDIPLVKKKLL<br>VATIDHDFKIEKTSKGFVLCITVE<br>CSLLRRVKPPAPLFDGYIHACGI<br>DPGVRSFVTYDPTQDCYQFG<br>TSAQKAERLDPITNAIDNWNFSV                                                                                                                                                                                   | CGCTCGAGTGGAGGGAAGTGA<br>GAGTGGAGATCACCGACGAACGCTGGACC<br>TCAAAGACGTGTGGCATGTGCAGATCCAT<br>CCACCGGAACTTGGGGCAAAGAAGTAT<br>TCGAGTGCCCAACTGCCACTACACCTGCC<br>ACAGAGACGTGCACGGAGCTCGAAACATC<br>TTGCTGAGAAGCTTCGGACAGTTTCCAGTC<br>TAGAAAAACACGAAGTTTTTCTTGGCCCA<br>AGGATTGCCAAACACCACTCAAATCCTCGT<br>TCAGGGGCCTCGAGTGGCTGGGCATATAT<br>GGGTTA           |

|        |         |                                                                                                                                                                                                                                                                                                                                                                                                                                                                                                                                                                                                                                                                                                                                                                              |                                                                                                                                                                                                                                                                                                                                                     |
|--------|---------|------------------------------------------------------------------------------------------------------------------------------------------------------------------------------------------------------------------------------------------------------------------------------------------------------------------------------------------------------------------------------------------------------------------------------------------------------------------------------------------------------------------------------------------------------------------------------------------------------------------------------------------------------------------------------------------------------------------------------------------------------------------------------|-----------------------------------------------------------------------------------------------------------------------------------------------------------------------------------------------------------------------------------------------------------------------------------------------------------------------------------------------------|
|        |         | DQHRDKAPPTAIESWSRKTKKL<br>WYKLNQVRS LHDQVIAHLLGA<br>YNFISLGKLDVSCFRRGTTAKSTN<br>RWLRIYRHF EFRTKLLARVEGTD<br>NCRVEITDERWTSKTCGMCRSIH<br>RELGAKELFECPNCHYTCHRDVH<br>GARNILLRSFGQFPV                                                                                                                                                                                                                                                                                                                                                                                                                                                                                                                                                                                            |                                                                                                                                                                                                                                                                                                                                                     |
| KnFnuc | Fanzor1 | MDEGADDSEEAKRKRPDITLRRR<br>LRKDKETS VVQTGWKFLCQELGI<br>RDRIEEIPEVTRIRVETCLLLNLHFI<br>RLLDEGRPIPIDQNLVGRAMQC<br>TYSKNPQADPDLHETFVHHYLPL<br>CPNRPNNSCLPRITNVLLDLRNQ<br>LLSNIKNHVAVLFQSRHRAFMKL<br>LLREAAPDV PFFGDADEDLESC<br>RLLTTATLWRPNESVRELLPEYPR<br>IYGRIP EAAIECLQDLVDSVRPEV<br>GPLPAAPQSRPHLYMPWMRIIS<br>EEFSDRELRSFSLVPHASFSAPFIA<br>ITPTTWPELQPKSGKRKAPGELR<br>DAFPSIGRLES GGTKFADRITTDG<br>VSASVYFLVEKRTPPPEDRVVHIH<br>PKQRVVGLDPGKHPDFLTGIAVT<br>GDWDGIERQEEIIGLGRDFYHR<br>AGFKKRTFLMHSWMSRDL DVA<br>AFNKDAPSGNTVSLEDFGKRVTF<br>VCANLYVLRV FHTARRVRKLRRR<br>VTIKKQIEVD RACKRITAGKKT VV<br>AFGAAQVWAGRTKRQCGPCES<br>VKRRLSSH KATVVMIDEFRTSQ<br>VCSTCHSDVGKFAVLKRQRVME<br>DGLPTVTEGGRREDEDEDGGGR<br>TSYKTCHN VRACTNPLCRMVWN<br>RDVNAARNIAWICMSIARGEGR<br>PAEFTRAGVWG* | GGAGGAGGGAGGACAAGCTACAAGACGT<br>GCCACAACGTGCGAGCGTGACGAACCCG<br>CTCTGTGCGCATGGTGTGGAATAGAGACGT<br>CAACGCAGCTCGTAACATAGCTTGGATCT<br>GTATGAGCATAGTCAGAGGGCAGGGCAG<br>GCCAGCGGAGTTCACGAGAGCAGGAATG<br>TGAGGATGACTGAGAATTAGTCGAAAGAC<br>ATAGCTGCCTAGAAACGAGTTCATCTAGG<br>CACTTCGGTGAGAATCCGAGATACGGCTG<br>GGTACTGTGGCGAGTGTGCCATTTACTCT<br>GAACAGACTGTA |
| CrFnuc | Fanzor1 | MAPKRRRDEAEKAEKEDHTTST<br>KCGLAGLLSEKIEADGVAVTREES<br>LAAVDFLVAALTRLRFEALCLLGL<br>VAVRM CEDARREGQGLQPHCA<br>TCRRLRKT ELVEDDMYAAICAVS<br>VCDLTEQGRKRGRPSKRDQHPE<br>DDLFRHVCEEHFPRDEEAAGARV                                                                                                                                                                                                                                                                                                                                                                                                                                                                                                                                                                                    | GCCGCCATGGCCCGGGCGGGCGGGG<br>CCGGGCTGAGAGCCTGAACGGCGCTAGCA<br>GGGCGTGGGGCTGAGGGTGCACGTGTTG<br>ATTGGCGGCGAGTGACGTGACTAGTTTGT<br>TAGCTGCGGGTTAGCACGGACTGTGCACC<br>CCACCCACCGGCCACGTTCCGGATTTGCG<br>GGGATGCAAAGGCCCCCAACATAGAGGC                                                                                                                       |

|         |       |                                                                                                                                                                                                                                                                                                                                                                                                                                                                                                                                                                                                                                                                                                                                                                                                                                                                                 |                                                                                                                                                                                                                                                                                                                                                                      |
|---------|-------|---------------------------------------------------------------------------------------------------------------------------------------------------------------------------------------------------------------------------------------------------------------------------------------------------------------------------------------------------------------------------------------------------------------------------------------------------------------------------------------------------------------------------------------------------------------------------------------------------------------------------------------------------------------------------------------------------------------------------------------------------------------------------------------------------------------------------------------------------------------------------------|----------------------------------------------------------------------------------------------------------------------------------------------------------------------------------------------------------------------------------------------------------------------------------------------------------------------------------------------------------------------|
|         |       | <p>NRSLTPFLPPLSKGVFTNVKNH<br/> YAANFAAWLARSFRCRIDDELRE<br/> LRTPATKLDKLAWSMAHAVLY<br/> DGELEQPRWWVGWAQGAAGA<br/> AAAAAAQGAGPAGGAAAAQA<br/> WTALVDYVNAQRASKRAAELL<br/> REVKGAQATYKKASTRHMEWA<br/> AEILAGLEARRDQLGAQVQQLT<br/> QAQPLTREDTQRLASLRRELHRA<br/> RPFTLTPSPSFAPIYVPLDNTSMA<br/> RLPGLLPTLARRHGEVFAGAGAG<br/> AVAPSSFVQAAFSGGGMQSSAT<br/> LNAVWGLFQLGGVTSRNAPFA<br/> NYITTDGVACSVAREAHNKPLAN<br/> LKPATAPADAEELCTLEEMKATQI<br/> IGVDPCGGGNWFMAARSPLYQ<br/> PGPWAWEGVGPQRYLLELHD<br/> KQLDEELFPGQLPPEPRRRRKG<br/> HRRKQSKHWQPRARTARRRQ<br/> KRGRFHMSMGHWRHMSGLE<br/> LQPNRQLAPALQAYVGGIPTAA<br/> TASAARFEERLRYLFASGAAGQA<br/> AGGPAEAGPRGAVHVLWHYHF<br/> SAFRRKRWAAFIQRDALHRVA<br/> KQLTGGRPKKEVVVGWGSWAF<br/> QGGKGGSPISVRGGRAPTGRLIK<br/> LLRERYAKHVFIIDEYKTSKTCYNC<br/> GCQEMAIKRLGGLKEGQRPWSV<br/> KVCNDCLTTWNRDVSAANVIRV<br/> LLLLKLMGFERPTKLQRPWPPA<br/> AAGPG*</p> | <p>GTGTGCTTAGTAGGCGCCCCGCTCAAGGT<br/> GGCTGGGTTGATAACGACCCGGGAGGGG<br/> AGGGCTCAGCCCTTTTCTGCCTCCCTAAG<br/> GCAGCCACCTCCTGT</p>                                                                                                                                                                                                                                       |
| TvoTnpB | TnpB2 | <p>MKRANAVKLIVGKETHEKLELAI<br/> VAAKCWNEVNWLRMQQFKEG<br/> ERVDFSKTEKEVYEKYKQILKVNT<br/> QQVARKNAESWRSFFSLIEEKKG<br/> KLPKWFKPRPPGYWKDKSGKYK<br/> MLIIRNDRYEIDEERKRIIYLKDFKL<br/> SLSFNGKWKWRGKQGRLEIYNEA<br/> RRSWYAYIPVEVQNDVKAEDKLE<br/> ASIDLGIINLATVYVEDGSWYIFK<br/> GGSVLSQYEYYSKRISVAQKTLAR<br/> HKQGRSREMILLHEKRKRFLKHA<br/> LNSMVRKIMEEFKNKGVGEIAIG</p>                                                                                                                                                                                                                                                                                                                                                                                                                                                                                                                 | <p>gggaagcccatgatgatggcgctattaagcgtggtctc<br/> tataggtgtctccgcataggaaggtaataaacgcgaga<br/> cctgaatggtgcaataaatatctacatatccccgagtc<br/> cctaggagctgggagcagagggcaactcacagtgagg<br/> gataggggtaatgggctgaagaccagcccgcggtct<br/> accgctggacgaatggagcggggtgggtgcctcacc<br/> actagctatgaagtgatgaaaatgaaggcggtaaact<br/> gcaaaccaatgaatcgccacaagggaaccttcaccct<br/> tagg</p> |

|                |       |                                                                                                                                                                                                                                                                                                                                                                                                                                                                                               |                                                                                                                                                                                                                                                                     |
|----------------|-------|-----------------------------------------------------------------------------------------------------------------------------------------------------------------------------------------------------------------------------------------------------------------------------------------------------------------------------------------------------------------------------------------------------------------------------------------------------------------------------------------------|---------------------------------------------------------------------------------------------------------------------------------------------------------------------------------------------------------------------------------------------------------------------|
|                |       | YPKEISKDHGNKLTVNFVWNYGYII<br>RRFEGVGEELGVKVVKVDEAWT<br>SKTCSLCGEAHDDGRIKRGLYRCL<br>RIGKVINADLNGAINILHIPESLGA<br>GSRGQLTVRDRGNGLKTQPAVY<br>RWTNGAGWVSSPTSYEVMKMK<br>AVNCKPMNRHKGTFTL                                                                                                                                                                                                                                                                                                           |                                                                                                                                                                                                                                                                     |
| Isdra2<br>TnpB | TnpB1 | MIRNKAFVVRLYPNAAQTELINR<br>TLGSARFVYNHFLARRIAAYKESG<br>KGLTYGQTSSSELTLLKQAEETSWL<br>SEVDKFALQNSLKNLETAYKNFFR<br>TVKQSGKKVGFPRFRKKRTGESY<br>RTQFTNNNIQIGEGRLKLPKLGW<br>VKTKGQQDIQGKILNVTVRRRIHE<br>GHYEASVLCEVEIPYLPAAPKFAA<br>GVDVGIKDFAIVTDGVRFKHEQN<br>PKYYRSTLKRRLKAQQTLSRRKKG<br>SARYGKAKTKLARIHKRIVNKRQ<br>DFLHKLTSLVREYEIIGTGHLKPD<br>NMRKNRRLALSISDAGWGEFIR<br>QLEYKAAWYGRLVSKVSEYFPSS<br>QLCHDCGFKNPEVKNLAVRTWT<br>CPNCGETHDRDENAALNIRREAL<br>VAAGISDTLNAHGGYVRPASAG<br>NGLRSENHATLVV | GATTCAAGAATCCCGAAGTGAAGAATCTT<br>GCCGTCCGTACATGGACTTGCCCGAACTGT<br>GGGGAAACCCATGACCGAGACGAGAACG<br>CTGCGCTGAACATTCGGCGTGAAGCGTTG<br>GTGGCTGCGGGAATCTCAGACACCTTAAA<br>CGCTCATGGAGGCTATGTCAGACCTGCTTC<br>GGCGGGCAATGGTCTGCGAAGTGAGAAT<br>CACGCGACTTTAGTCGTGTGAGGTTCAA |



**Table S3: NLS sequences used in the study.**

| organism                 | family       | NLS Sequence                                                                                                                                                                                                                                                                                                 |
|--------------------------|--------------|--------------------------------------------------------------------------------------------------------------------------------------------------------------------------------------------------------------------------------------------------------------------------------------------------------------|
| Catovirus CTV1           | family5      | ATGGACTGTTTTATCACTTGCTTGCAGTCTTGGGAGAGAATTTTGAACGAAAGCAACAGAAAGAAAAGGCCGCGCTTGTCTCTATTCTCCCTCGGAAGTCTGGATTCACTATAAGCTATGTCCCAATATCAAGTATGACATTGATGAAACTTCTGTCCATGGGGATAGTCCACTTGAGTCTGTTAGAGGGGACGGACGACATGAAACCAACAGCATGCTGTGGCGGAAGTATTTCAATGTGCAGGGTTGGAGACAAAGGGAAGTCGCTTCGATAATCGCATCTTGTCTGACGGGAAA    |
| Prototheca cutis         | unclassified | ATGATGAGGGAAGTTTCTAAAAAGGGAAAGGAAAGGAAAAAGTCTCTGCTTCCACTTCAAGGAGTAGGAAAGGAAAGGAAAAAGGCAAAAAAGGTCTTCCAAAGCTGCCTCTTCTGCCAAAGCCAAGATTACCGAAGGGAATATGCCACAAATGCTCAGTTTGGTTAAGCCGTTGTTGAGAAACACTCAATCCCGTTTGTGGCGTAGACCAGGGATTGCGACAACCTGGGGTCTCCACTAACTTCGGCAGCAGATCTATAACACATGGACCCTGAGAGCGTCCGCGATTAATCAC      |
| Andriacus curvator       | unclassified | ATGATGGCCTGTAAAATTGGCGCTCTGAAAAGGCGCAAGGGTAAACACGGTAAGATTAATATAAGCTATGCGGAATACAAGGAAAAATCCGTTTCAGTTGTTGAACTATGTTTTTGGACATGTATAAGATTAAAAAACTGGGGAAAGGCAAGGAATTTGAGTTCTGGCCCTCACCGATAATGTTGCAGTCAGCCTGGTCTATATTGAGCCATTAAGCAGAGAGCATAGGGCTGAGCTGGGAGCGGATTCCGCACATGTTTGGAGTACTCAAGTGCTTTGTTTATGAAATAGGCATAGAT  |
| Torulasporea delbrueckii | family5      | ATGATGACGGAGATCAACTATTACTGGTTTAAAAAGAAAAAATAAATTTGAGTCTAACTCTTGTTTTACATCAATAGCATAGAAAACAAGAAAAAGAGTTTGAAGAGAATGATATACCTCTTAAACAAATATCTGAGTTGTAACCAGATAGAAATTTACCCCAACAACCTACCAGAAGGATATTCTTCTGAAATGGATGGATCTTTTCATAGATATGTATAATCACACAAATTTATTCATCAATAACAACATATACGACTTTACCAATAGGAAGATTAAGAACAATGTGAAAGAC      |
| Globisporangium ultimum  | unclassified | ATGAAACGCAACAGCAGAAGAAACGACCGAGACTCTTTTCCATCCTTCCGCGCAAGTCAGGATTCACCATTCTCTACGTCCTATTTCTAGTATGACACTGATGAAACTGCTTCTATGGGGGATAGTCTCTTGAAGCTTTTCGAGGGGATGGCAGACAGAAAACCATAGCATGCTTTGGAGAAAGTATTTCAATGTGCAAGGATTGAAACC AAGGGCAGCCGTTTCGATAATAGGATCTTGTCCGATGGTAAAGGCGTATCAGTCCAGATGAAGCATCAGGCATCAGAGGACGTG      |
| Globisporangium ultimum  | family4      | ATGATGATTAAGAAAAGTACTCTAGCAACAAGCGCAAAAAGGTATCTTACCACACCCGAAAGAAAACGCATGTCAGACGCCCAAATCAGTACGAAAGCTACGACAATACACGGCAGAAAGCATCCCTCATACTCAAAGAGCAA GCCCGAGCAACGCCGCCCATATCAGTGACATATGAGACCTTTTGGGGCTTCGACCCTGGTAGAAAAGGCTATGGTCCGCCGGGTGGTAAGAACCAGCGACCCGATGCCTTTCAAAGACGACAAGACACGGGATAAGCCGTTTATGTGCGGAGGTCA |
| Scenedesmus sp. PAB B004 | family1      | ATGATGAATGAAATCCAACCTCCCTACCCCGAGGGGTCCGCGAGGCGGAAACGAAAGAGACAAACCGAACCCCAAATAAGTTACGATCAGGCCAAAAACACTTTGCTTGGTGTGCTTTTGCAGAACTCAAGTCCACAATCGCTAATGAACTGTGAAAAACGAGACGAAGAATAGTCGGAAAAACAAAAAAGGTAAAGCAGTCAGCCAAGACTAAGGGCAAGCGCTTGAAGCACAAGAGAAACGGATGAATAGACTTAGACAGGCATTGAAAAAGGCTGACCCGCATCCCCCGGGGCAGT  |
| Scenedesmus sp. PAB B004 | family1      | ATGATGAGCTATGGGATTGAGATTGAGACGGTAGCAAAACGAACGAGCAAAAAGTAAAAAAAACGGAAGTTCGCACAGCAACTGCATTGAGATGGAGAAAGCGTTACCATCCTGTATGAGTCAGAGCTGAAGCCCCGCTCTGACGTAGAAAAATAAATCAGAAAAATTAAGAAAAATTACGCACAGGATAAATACAAGTATCGAACAAAGTATCGATGTGGGATTTAATACATATATTGCTGTAAGAGACTTACCATAGAGACTGGCAAGGAAGTCAACTGAAACTCAAATCTAAACAT  |
| Chlamydomonas sp. ICE-L  | unclassified | ATGATGAAAGAGGCAGTGAAGAATGTGAAACCCAAAGTGCCAGCGAAGAACGAATAATTACAGGTAGTAAACTAAGAAGAAGTTTTCTGTAAGAAAGAGCCGCCGACAAAAACCCCTTGAAGAAACCCGTCAAAAAACAGTTAAAAACAGATAAGCCCAAGTCTATATATGTCCCAATAAGGATTTGAAAAATTTCCAAATGGATACCGACACCTAAAAAAGAGTTCACGGAATAGAAACGAACCTCATGGTACGAGCACCGCAAGTTTGAACCCCAACAAAGAGCCCGTCCAA       |
| Chlamydomonas sp. ICE-L  | unclassified | ATGCCTTCTCTGCACGACTCGATACTGTAGACGGCCAAAGCAAGAATGAGAAAAGAAAGCGCAAGACCTCTCAGATTTGGTGGTGGCCTCCAAATTTGGATTATAGCGTCGCTCATAGTATTTGAGAATGGACTCTTTGATATGGACAAAGAGTGCCGCTAGCATACACGCAAGGCAGACTTTTGTCTTACAAGAATACCAAGAATATGGGTCCGCCAGCCAAACGAGTCGAAAGTGGCGCAATTCCTTGGTCTCAGTGACGAGAATTGTAAGTGTGTTTCGCCGCT              |
| Chlamydomonas sp. ICE-L  | family4      | ATGAAGCGAGCAGGCGGTGCGAAAAGGAGGTACCCGGCGAAAGCAGTCAAAGCATTGGCAACCGCGGGCAAGAACCGCAAGAAGAAGAGCGCCAAAAAGAGGAAGACTGCACATGTCCATGGGCCACTGGAGGCATATGAGTGGGCTTGAAGACTGCAACCAACAGACCACAGCTCGCACCAGCGTTGCAAGCGTATGTCGGAGGTATCCAACTGCCGCTACAGCATCATCTGCCAGTTTGAAGAGAGATTGCGCTACTTGTTCGCTCTGGCGCTGCGGGCAGGCTGCCGGACG       |
| Chlamydomonas sp. ICE-L  | unclassified | ATGATGCGGGAGGTCAAGCGGGAACTAAGAGAGCGAGACAGCCTGAGGTGAAGAGTGTAGCATTGAAAAAGCTAAGAAGACAGGTAGGGCTTCCAAGCAGGCTTCTTCTTAAACACGGCGTTTATAGCCAATCCCTGCCTGCTGCGGGAGCACTGAACACAGATCAACGCGAGCGAAGTCTTGTCCCGGCATACTAAATCAACGGAGAAATCCTTGAGGACCAACTGGGAAGGGCTTTGAGACATTTACACGCAAGCGCCTTTGCACTCTGTCTAGTGAAGCACACAGA            |

|                                                      |                              |                                                                                                                                                                                                                                                                                                                            |
|------------------------------------------------------|------------------------------|----------------------------------------------------------------------------------------------------------------------------------------------------------------------------------------------------------------------------------------------------------------------------------------------------------------------------|
| Cato<br>virus<br>CTV1                                | fam<br>ily5                  | ATGTACCTCTTGATGAAGAAGAAAAAGAACCTGACAAAAACAAAAGTGACAAAGAAAAAGAGTATGAAGAA<br>AAGTATCGAAAAGTATATCACATCCTATAAAGACACACAAGACATCACTCGAAAACATTATTAAGAATACCGACG<br>ACTTGAAAAAATCAACGACGCGGTTTATAGGATTAACCTTATCATTTGCCACACCTATCAGTTCCTTAACT<br>GTACTACCTGTACGAATTCATAATAAGGGTAGAATTATAGTGATTGATGAGCAACTCGTGAACACCACGAT<br>GAAGTTGTTC |
| Indivi<br>rus<br>ILV1                                | fam<br>ily4                  | ATGATGAAAAAGCCTAAGGTGAAAGAGAAAGAGAAGGAAAAGGAGAAGAAAATTTTCGATTTTATGAAGACT<br>AATAAGGGGAATATCCATAAGCTCATAAAGGATAAGATGGTACTCTCTATAATCGACGAGTTGGTGGTGAGG<br>GTCAACAAAATCGTAATCCATGCGTATCAGTTTAAACAACTCTTTTGCCTACCTGTATAACAACCACTTC<br>CTCTCCGTTTCTGGACAAAGAGTACATTTGCGACATATTCCGGGTTATCACGAAAAGAAAATGCGGTAAAG<br>GAGTTATACT    |
| Apop<br>hyso<br>myce<br>s<br>varia<br>bilis          | fam<br>ily1                  | ATGATGGAGACTATCGTAAATAAAGAACCACCCGACAAGCGCACCCGCCGGATCGGGCTGCAAAAATTA<br>AGACCGCAAAAATGGGGAAGAAAACGTCGTTAAATGTACTCTTTCCAGGATCATAGCCGATAAGGACAACAA<br>AGACGTAATTACCAAAGTCATCAAAGAGAGGGTGGACAGTGTATCCAAACGAACGATTTTGGCCGGAGTAG<br>CGGTGAACAGGATTTTGAAGAAGTCTTCGAGGGGGTACCTGATGCTCAGCTCCATACGGTCTCAGTACCT<br>TCCGTTGACCAAAAT  |
| Apop<br>hyso<br>myce<br>s<br>varia<br>bilis          | unc<br>lass<br>ifie<br>d     | ATGAGCCCCGGATCATCTGCGGCGAGAAAGAAAAACGAGAAGCAGTGTCCGGTGCAGAAGAAGCGAAAGA<br>GACGCGGCCCGAAAGGTGGGGGTCCGGCCAGTAAAACCGCAAGAAAGACGACAGTAAGGAGAGATGGGG<br>GGGAATCACTTTCTTTGGACGTACCAGGGTGTAGTTCAAGGGAAAAGTAGCTAGGAGATATAGAAAACAT<br>GCCGGTTTGTTCATCAGGAACACCATAAGGATGTGGTGCGAACAGACGCTTTCCGGGAGAGGGATGTCTCA<br>AGAAGGGATGCCCATGGG |
| Apop<br>hyso<br>myce<br>s<br>varia<br>bilis          | fam<br>ily4                  | ATGATGGCAAGCCGAAACAAGCGGAAAAAAGCCGAGGGCAGCAGCAGTGCAGTGCAGCAGCAGTGCAGCAG<br>GACGATTTCCAACAACCTCCTCCGCCGAAAGGGTAAATTGAATATGAAATGCAGATGACGGATAGTGAGCC<br>GGGGCCTTCAACCCCTCCGTCCTCCAGTATGGTCTACGCAAAAATAACAGTAGCAAGGAAAAGCCCCGGA<br>GTCTTAAAGGGAAAGAAAAGGCGACATTCGACAGTGCAGTGTATTTCCAACCCTTGCCCCACCAAACGA<br>AAACAACCTCTGCAGTT |
| Apop<br>hyso<br>myce<br>s<br>varia<br>bilis          | unc<br>lass<br>ifie<br>d     | ATGGTTCACCTTATACTCATTCTTATGACGAAGAAAAAGAAAAATTCAAGAAAAAGAAGATTTTTTACAAAA<br>ATACCACAAATTCAACTGGCTCTCCAGGCTCTTCAATGATAATCAGTTTAGTGATCTTAGTTCCTATATATTCT<br>TTCATGGAGACCATTCTGGAAGCACAAGTATAACTTGCCATTCAAGAGTCAATTGCTTTTTCATGGTTTGA<br>TTTTATAAATCCATACAAATTTCTCCAGCAAATCCTATAATGCCGTCGGATGCCAGGTTCTGGACAAGACA<br>AAATTT     |
| Cyani<br>diosc<br>hyzo<br>n<br>merol<br>ae           | unc<br>lass<br>ifie<br>d     | ATGCCACTGACGCGAAGGCGACGACAAAAATCCCGGAGAGGGCTTCACCGGAGACATAGGACGAGGCGG<br>GCGCGACGCAAGAGCGAGTCATCGAAATCTCCACCCCAAGTATCGACATCTCGCCCGGATGAACGACTT<br>CAGGTTTTACAACGAAAATCTGAAGATGAGAGAGCCGTGGTATGCTGGCGTTATGCGCGCCATGCCAAGTT<br>TCAAGACAAGTAGCTATGATCTTATTTTTCAGAGGCTTCAGTTTCTGGAAGCACCTTAGATTTCTTTTGGT<br>GTTTAGTGCGGAACAG   |
| Cyani<br>diosc<br>hyzo<br>n<br>merol<br>ae           | unc<br>lass<br>ifie<br>d     | ATGTCTCCACGGCCGACGCCGGCTGCGCCTCTGACGCGCAGGGAAGAGCCCCGCGGGGGCGCCCCGGC<br>ACCCGCTGGCAGACGAGGGGGGGCTGCAGCACCTAGACCGGGGGCGAGGAGACGGGCAGGGAGGGGGC<br>GCCGGTCCAGGTCTGGTGCGGCTTTCCCGCGCGGCTGCCGAAAGACTGCGCCTGGCCCTTGCCGCA<br>CTTACAGCTGCCGGAGACGCAACAGTGGAGCCGACCTCGCTGCGGTGCAAGCTGAGTGGCAGGCTGCC<br>ATGGCGCAACATCACGAACGGGACGCC  |
| Chl<br>am<br>ydo<br>mo<br>nas<br>rein<br>har<br>dtii | un<br>cla<br>ssi<br>fie<br>d | ATGTGTAGGAGGTGCCGATCACGCCATTTGGCTGGCTGGTTCGGAGGATGAAAAAGAGACGACGACGGGTCTCCG<br>ACCAAAAAGTGCATGATAACAACCTGTCTCTGGCCAGAACCGGGTATCCGAATAAGTTCTCCCTGCAGCATAGG<br>AGTGTCCCAAGATGGGCTGACCGTACTTATGTCAAAAAGATATGCGCTGCTGCGAATTTCTCGCGCCGCTATTA<br>CCGGGAGAGCGGAATAATGAACGCGTGAAAAAATCAGCGCCTGGGATGCGGGCATGAAGGAC                  |
| Con<br>tari<br>nia<br>nas<br>turt<br>lii             | fa<br>mi<br>ly3              | ATGATGTATTGTATGCATGAGGATTCAGTCATAAAAAGGGTCCGGCGCGGACGATGCGGATCAGCTCAAGGGAGTG<br>GGCTTTCTGACTCGATCTCGCAAATTCGACGCTGTGAGAAGGCTTATGACCAAAGCGTAAGAAAGGCATTGCAA<br>CGACTCGCGCGGAAGCACCGAATGGGGCTCGGGCTGCACCGTGGCGGACTTTCTTGCTTACCTCAGAGTCTTTGGG<br>CAGGTAGAGGCCATTTGAGCAAGCATTACAGTAAACCATCTTCAGAAAACCTTAGGCTGTGGACG            |



**Table S4: NGS primers used in this study.**

| <b>NGS Primers</b>                                                            | <b>Name</b>             |
|-------------------------------------------------------------------------------|-------------------------|
| ACACTCTTCCCTACACGACGCTCTCCGATCTCtgaattgtgagcggataacaattcacacagg               | TAM_NGS_F1              |
| GTGACTGGAGTTCAGACGTGTGCTCTCCGATCTctgcaaggcgattaagtgggtaaccg                   | TAM_NGS_R               |
| ACACTCTTCCCTACACGACGCTCTCCGATCTCacgtggagtccaaccctggacc                        | Luciferase_Indel_NGS_F1 |
| GTGACTGGAGTTCAGACGTGTGCTCTCCGATCTtcagcatcgagatccgtggtcgc                      | Luciferase_Indel_NGS_R1 |
| ACACTCTTCCCTACACGACGCTCTCCGATCTCttgttgaggattcgttttctccttgaatttgg              | EMX1_Fanzor2_NGS_F      |
| GTGACTGGAGTTCAGACGTGTGCTCTCCGATCTattgactgtagacctagactacagaccg                 | EMX1_Fanzor2_NGS_R      |
| ACACTCTTCCCTACACGACGCTCTCCGATCTCgggtcacagggcaagactttgtctc                     | HPRT1_Fanzor2_NGS_F     |
| GTGACTGGAGTTCAGACGTGTGCTCTCCGATCTgccaccacgctggctaatt                          | HPRT1_Fanzor2_NGS_R     |
| ACACTCTTCCCTACACGACGCTCTCCGATCTCatcattccaccaatcaggactcggc                     | dync1h1_NGS_F           |
| GTGACTGGAGTTCAGACGTGTGCTCTCCGATCTccagcctggtaaacctagcgaga                      | dync1h1_NGS_R           |
| ACACTCTTCCCTACACGACGCTCTCCGATCTCcttctccccacagcctccc                           | b2m_NGS_F               |
| GTGACTGGAGTTCAGACGTGTGCTCTCCGATCTgctgtaaactagccaggttgggaata                   | b2m_NGS_R               |
| ACACTCTTCCCTACACGACGCTCTCCGATCTCgtctgagtcttcaagtttctcctccagct                 | cxcr4_NGS_F             |
| GTGACTGGAGTTCAGACGTGTGCTCTCCGATCTacagtcctaccacgagacatacagcaac                 | cxcr4_NGS_R             |
| ACACTCTTCCCTACACGACGCTCTCCGATCTCagagactcagagtccaagaggggaagc                   | CA2_NGS_F               |
| GTGACTGGAGTTCAGACGTGTGCTCTCCGATCTactagggagtggttatgcacaggtat                   | CA2_NGS_R               |
| ACACTCTTCCCTACACGACGCTCTCCGATCTCTCCTCAGTTCTATCCATGTTGTTGCAAATGGTAAG           | DMD_NGS_F               |
| GTGACTGGAGTTCAGACGTGTGCTCTCCGATCTTCTTTAATCAATGCTTTGTAGTTTTCACTGTATAAATATTTACC | DMD_NGS_R               |
| ACACTCTTCCCTACACGACGCTCTCCGATCTCATGTCTGGAATTGAGCCAGGTACTGGG                   | Grin2b_NGS_F            |
| GTGACTGGAGTTCAGACGTGTGCTCTCCGATCTCATTAAACCAGGTACTGGCCC                        | Grin2b_NGS_R            |
| ACTATAGGG                                                                     |                         |

**Table S5. TAM library and spacer sequences used in study.**

| Name                | Sequence                                                                                                                                                                                                                                                                                                                                                                                                                                                                                                                                                                                                                                                                                                                                                                                                                                                                                                                                                                                                                                                                                                                                                                                                                                                                                                                                                                                                                                                                                                                                                                                                                                                                                                                                                                                                                                                                                                                                                                                                                                                                                                                                                                                                                                                                                                                                                                                                                                                                                                                                                                                                                                                                                                                                                                                                                                                                                                                               |
|---------------------|----------------------------------------------------------------------------------------------------------------------------------------------------------------------------------------------------------------------------------------------------------------------------------------------------------------------------------------------------------------------------------------------------------------------------------------------------------------------------------------------------------------------------------------------------------------------------------------------------------------------------------------------------------------------------------------------------------------------------------------------------------------------------------------------------------------------------------------------------------------------------------------------------------------------------------------------------------------------------------------------------------------------------------------------------------------------------------------------------------------------------------------------------------------------------------------------------------------------------------------------------------------------------------------------------------------------------------------------------------------------------------------------------------------------------------------------------------------------------------------------------------------------------------------------------------------------------------------------------------------------------------------------------------------------------------------------------------------------------------------------------------------------------------------------------------------------------------------------------------------------------------------------------------------------------------------------------------------------------------------------------------------------------------------------------------------------------------------------------------------------------------------------------------------------------------------------------------------------------------------------------------------------------------------------------------------------------------------------------------------------------------------------------------------------------------------------------------------------------------------------------------------------------------------------------------------------------------------------------------------------------------------------------------------------------------------------------------------------------------------------------------------------------------------------------------------------------------------------------------------------------------------------------------------------------------------|
| TAM Library Plasmid | gatcaaaggatccttcttgagatccttttttctgcgcgtaatctgctgcttgcaaacaaaaaa<br>ccaccgctaccagcgggtggtttggttgccggatcaagagctaccaactccttttccgaaggtaa<br>ctggcttcagcagagcgcagataccaaatactgttcttctagtgtagccgtagttaggccacca<br>cttcaagaactctgtagcaccgctacatacctcgctctgctaatacctggttaccagtggtgct<br>gccagtgggcgataagtcgtgtcttaccgggttgactcaagacgatagttaccggataaggcgc<br>agcggctcgggctgaacggggggttcgtgcacacagcccagcttgagcgaacgacctacccga<br>actgagatacctacagcgtgagctatgagaaagcgccacgcttcccgaagggagaaaggcggac<br>aggtatccggtaagcggcagggtcggaacaggagagcgcacgagggagcttccagggggaaacg<br>cctggatcctttatagtcctgtcgggttcgccacctctgacttgagcgtcgattttgtgatg<br>ctctcagggggcgagcctatggaaaaacgccagcaacggcctttttacggttcctggcc<br>ttttctgctggccttttctcacatgttctttcctgcttatcccctgattctgtggataaccgta<br>ttaccgcctttgagtgagctgataccgctcgcgcagccgaacgaccgagcgcagcagtcagt<br>gagcgaaggaagcgggaagagcggccaatacgaacccgctctcccgcgcgcttgccgattcat<br>taatgcagctggcagcagcaggtttcccgactggaaagcgggagcagtgagcgaacgcaattaatg<br>tgagttagctcactcattagccacccaggctttacactttatgcttccggctcgtatggtgtg<br>TGGAATTGTGAGCGGATAACAATTTACACAGGAAACAGCTATGACCATGATTACGCCAAGCTT<br>NNNNNNNGCAGCCACCTCCTTGTATTGGGTACCGAGCTCGAATTCCTGGCCGTCGTTTTACA<br>ACGTCGTGACTGGGAAAACCCTGGCGTTACCCAACCTAATCGCCTTGCAGcacatccccctttc<br>gccagctggcgtaatagcgaagaggcccgaccgatcgcccttcccacagttgctgcagcctga<br>atggcgaatggcgcctgatgcggtattttctccttacgcaTCTGTGCGGTATTTACACCCGCAT<br>ATGGTGCCTCTCAGTACAATCTGCTCTGATGCCGCATAGTTAAGCCAGCCCCGACACCCGCCA<br>ACACCCGCTGACGCGCCCTGACGGGCTTGTCTGCTCCCGGCATCCGCTTACAGACAAGCTGTGA<br>CCGTCTCgggagctgcatgtgtcagaggttttcaccgtcatcaccgaaacgcgcgagacgaaa<br>gggcctcgtgatacgcctatttttataggttaatgtcatgataataatggtttcttagacgtca<br>ggtggcacttttcggggaaatgtgcgcggaaccctatttgtttatttttctaaatacattcaa<br>atatgtatccgctcatgagacaataaccctgataaatgcttcaataatattgaaaaaggaagag<br>tatgagattcaacatttccgtgtcgccttattccctttttgcggcattttgccttctgtt<br>tttgctcaccagaaacgctgggtgaaagtaaaagatgctgaagatcagttgggtgcagcagtg<br>gttacatcgaactggatctcaacagcggtaagatccttgagagttttcgccccgaagaacgttt<br>tccaatgatgagcacttttaagttctgctatgtggcgcggtattatcccgtattgacgcggg<br>caagagcaactcggctcgcgcatacactattctcagaatgacttggttgagtaactcaccagtca<br>cagaaaagcatccttacggatggcatgacagtaagagaattatgcagtgctgccataaccatgag<br>tgataaactgcggccaacttacttctgacaacgatcggaggaccgaaggagcctaaccgctttt<br>ttgcacaacatgggggatcatgtaactcgccttgatcgttgggaaccggagctgaatgaagcca<br>taccaaacgacgagcgtgacaccacgatgcctgtagcaatggcaacaacgttgcgcaaactatt<br>aactggcgaactacttactctagcttcccggcaacaattaatagactggatggaggcggataaa<br>gttgcaggaccacttctgcgctcggcccttccggctggctggtttattgctgataaatctggag<br>ccggtgagcgtgggtctcgcggtatcattgcagcactggggccagatggtaagccctcccgtat<br>cgtagttatctacacgacggggagtcaggcaactatggatgaacgaaatagacagatcgtgag<br>ataggtgcctcactgattaagcattggtaactgtcagaccaagtttactcatatatactttaga<br>ttgatttaaaacttcatttttaatttaaaaggatctaggtgaagatcctttttgataatctcat<br>gaccaaatacccttaacgtgagttttcgttccactgagcgtcagaccccgtagaaaa |
| 21 nt report        | GCAGCCACCTCCTTGTATTG                                                                                                                                                                                                                                                                                                                                                                                                                                                                                                                                                                                                                                                                                                                                                                                                                                                                                                                                                                                                                                                                                                                                                                                                                                                                                                                                                                                                                                                                                                                                                                                                                                                                                                                                                                                                                                                                                                                                                                                                                                                                                                                                                                                                                                                                                                                                                                                                                                                                                                                                                                                                                                                                                                                                                                                                                                                                                                                   |

|                                     |                       |
|-------------------------------------|-----------------------|
| er<br>Gui<br>de<br>seq<br>ue<br>nce |                       |
| EM<br>X1-<br>1                      | aaaaaaaaagaaaagaaaaa  |
| EM<br>X1-<br>2                      | aagagtggccttgattgta   |
| EM<br>X1-<br>3                      | aaataaaatttaaaaaaaaa  |
| EM<br>X1-<br>4                      | gttccagttttatttgta    |
| EM<br>X1-<br>5                      | gagaaacaaatgaaaggac   |
| DY<br>NC<br>1h<br>1_<br>G1          | gagatggtaggttcttctaa  |
| DY<br>NC<br>1h<br>1_<br>G2          | aatacacatagatatagggtc |
| DY<br>NC<br>1h<br>1_<br>G3          | aaaaaacaaaaaaccaaaa   |
| DY<br>NC<br>1h<br>1_<br>G4          | aacatcaaagtgactgtcag  |
| DY<br>NC                            | caaaattctaattt        |

|                  |                      |
|------------------|----------------------|
| 1h<br>1_<br>G5   |                      |
| B2<br>m_<br>G1   | gtgatcatgtaccctgaata |
| B2<br>m_<br>G2   | aaagaatTTTatacacata  |
| B2<br>m_<br>G3   | tacacatatatttagtgca  |
| B2<br>m_<br>G4   | gtagcactaacacttctctt |
| B2<br>m_<br>G5   | aatacacttatattcagggt |
| cxc<br>r4_<br>G1 | tatctgaaaaatgtgtaact |
| cxc<br>r4_<br>G2 | tacgataaataactttt    |
| cxc<br>r4_<br>G3 | agttacacatttttcagata |
| cxc<br>r4_<br>G4 | tatctgaaaaatgtgtaact |
| cxc<br>r4_<br>G5 | attgacttatttatataaat |
| CA<br>2_<br>G1   | tagtcagaagaagaagtttg |
| CA<br>2_<br>G2   | cagaaagatccaaacttctt |
| CA<br>2_<br>G3   | ttcatctgacaacttcttt  |

|                       |                       |
|-----------------------|-----------------------|
| CA<br>2_<br>G4        | tagatgaggagacttgtaga  |
| CA<br>2_<br>G5        | attctacaatgatatattgt  |
| DM<br>D_<br>G1        | TATAAATGAATATTCCGTTGT |
| DM<br>D_<br>G2        | TCCATTTATCTGTTAATGGC  |
| DM<br>D_<br>G3        | CAGTATCATCAGGAAGAATAA |
| DM<br>D_<br>G4        | TTCTTCCTGATGATACTGTA  |
| DM<br>D_<br>G5        | GTTAAATTTATTCCTCTTTT  |
| GRI<br>N2<br>b_<br>G1 | GCTCCCTAAGGGGACAGACC  |
| GRI<br>N2<br>b_<br>G2 | AGTTTAACTTTATGAAATTGC |
| GRI<br>N2<br>b_<br>G3 | ACTTTATGAAATTGCCTTTT  |
| GRI<br>N2<br>b_<br>G4 | TTATATGTCAATAATGGTTA  |
| GRI<br>N2<br>b_<br>G5 | TATGTCAATAATGGTTATTTT |



**Data S1.**

Table of all discovered Fanzor sequences in this study.
